# Loss-of-function of *MFGF8* and protection against coronary atherosclerosis

Sanni E. Ruotsalainen<sup>1</sup>, Ida Surakka<sup>2</sup>, Nina Mars<sup>1</sup>, Juha Karjalainen<sup>3</sup>, Mitja Kurki<sup>3</sup>, Masahiro Kanai<sup>3-5</sup>, Kristi Krebs<sup>6</sup>, Pashupati P. Mishra<sup>7-9</sup>, Binisha H. Mishra<sup>7-9</sup>, Juha Sinisalo<sup>10</sup>, Priit Palta<sup>1,6</sup>, Terho Lehtimäki<sup>7-9</sup>, Olli Raitakari<sup>11-13</sup>, *Estonian Biobank research team*, Lili Milani<sup>6</sup>, *The Biobank Japan Project*<sup>14</sup>, Yukinori Okada<sup>5,15</sup>, *FinnGen*, Aarno Palotie<sup>1,3</sup>, Elisabeth Widen<sup>1</sup>, Mark J. Daly<sup>1,3,4</sup>, Samuli Ripatti<sup>1,3,16\*</sup>

- 1) *Institute for Molecular Medicine Finland (FIMM), HiLIFE, University of Helsinki, Helsinki, Finland*
- 2) *Department of Internal Medicine, University of Michigan, Ann Arbor, Michigan, USA*
- 3) *The Broad Institute of MIT and Harvard, Cambridge, Massachusetts, USA*
- 4) *Analytic and Translational Genetics Unit, Massachusetts General Hospital, Harvard Medical School, Boston, Massachusetts, USA*
- 5) *Department of Statistical Genetics, Osaka University Graduate School of Medicine, Suita, Japan*
- 6) *Estonian Genome Centre, Institute of Genomics, University of Tartu, Tartu, Estonia*
- 7) *Department of Clinical Chemistry, Faculty of Medicine and Health Technology, Tampere University, Tampere, Finland*
- 8) *Finnish Cardiovascular Research Centre, Faculty of Medicine and Health Technology, Tampere University, Tampere, Finland*
- 9) *Department of Clinical Chemistry, Fimlab Laboratories, Tampere, Finland*
- 10) *Heart and Lung Center, Helsinki University Hospital and Helsinki University, Helsinki, Finland*
- 11) *Research Centre of Applied and Preventive Cardiovascular Medicine, University of Turku, Turku, Finland*
- 12) *Centre for Population Health Research, University of Turku, Turku University Hospital, Turku, Finland*
- 13) *Department of Clinical Physiology and Nuclear Medicine, University of Turku, Turku, Finland*
- 14) *Institute of Medical Science, The University of Tokyo*
- 15) *Laboratory for Statistical Analysis, RIKEN Center for Integrative Medical Sciences, Yokohama, Japan*
- 16) *Department of Public Health, Clinicum, Faculty of Medicine, University of Helsinki, Helsinki, Finland*

\*Corresponding author

Tel: +358 40 567 0826

E-mail: [samuli.ripatti@helsinki.fi](mailto:samuli.ripatti@helsinki.fi)

NOTE: This preprint reports new research that has not been certified by peer review and should not be used to guide clinical practice.

# Abstract

Cardiovascular diseases are the leading cause of premature death and disability worldwide, with both genetic and environmental determinants. While genome-wide association studies have identified multiple genetic loci associated with cardiovascular diseases, exact genes driving these associations remain mostly uncovered. Due to Finland's population history, many deleterious and high-impact variants are enriched in the Finnish population giving a possibility to find genetic associations for protein-truncating variants that likely tie the association to a gene and that would not be detected elsewhere.

In FinnGen, a large Finnish biobank study, we identified an inframe insertion rs534125149 in *MFGE8* to have protective effect against coronary atherosclerosis (OR = 0.75,  $p = 2.63 \times 10^{-16}$ ) and related endpoints. This variant is highly enriched in Finland (70-fold compared to Non-Finnish Europeans) with allele frequency of 3% in Finland. The protective association was replicated in meta-analysis of biobanks of Japan and Estonian (OR = 0.75,  $p = 5.41 \times 10^{-7}$ ).

Additionally, we identified a splice acceptor variant rs201988637 in *MFGE8*, independent of the rs534125149 and similarly protective in relation to coronary atherosclerosis (OR = 0.72,  $p = 7.94 \times 10^{-06}$ ) and related endpoints, with no significant risk-increasing associations. The protein-truncating variant was also associated with lower pulse pressure, pointing towards a function of *MFGE8* in arterial stiffness and aging also in humans in addition to previous evidence in mice. In conclusion, our results show that inhibiting the production of lactadherin could lower the risk for coronary heart disease substantially.

**Keywords:** coronary atherosclerosis, myocardial infarction, loss-of-function, *MFGE8*

## 25 Introduction

26 Cardiovascular disease (CVD) is the leading cause of premature death and disability worldwide, with  
 27 both genetic and environmental determinants<sup>1, 2</sup>. The most common cardiovascular disease is  
 28 coronary heart disease (CHD), including coronary atherosclerosis and myocardial infarction, among  
 29 others. While genome-wide association studies (GWAS) have identified multiple genetic loci  
 30 associated with cardiovascular diseases, exact genes driving these associations remain mostly  
 31 uncovered<sup>3</sup>.

32  
 33 Due to Finland's population history, many deleterious and high-impact variants are enriched in the  
 34 Finnish population giving a possibility to find genetic associations that would not be detected  
 35 elsewhere<sup>4</sup>. Many studies have reported high-impact loss-of-function (LoF) variants associated with  
 36 risk factors for CVD, such as blood lipid levels, thus impacting on the CVD risk remarkably. For  
 37 example, high-impact LoF variants in genes *LPA*<sup>4</sup>, *PCSK9*<sup>5</sup>, *APOC3*<sup>6</sup> and *ANGPTL4*<sup>7</sup> have been  
 38 shown to be associated with Lipoprotein(a), LDL-cholesterol (LDL-C) or triglyceride levels and  
 39 lowering the CVD risk.

40  
 41 Besides blood lipids, other risk factors for CVD include hypertension, smoking and the metabolic  
 42 syndrome cluster components. The mechanism that links these risk factors to atherogenesis, however,  
 43 remains incompletely elucidated. Many, if not all, of these risk factors, however, also participate in  
 44 the activation of inflammatory pathways, and inflammation in turn can alter the function of artery  
 45 wall cells in a manner that drives atherosclerosis<sup>8</sup>.

46  
 47 Using data from a sizeable Finnish biobank study FinnGen (n = 260 405), we identified an inframe  
 48 insertion rs534125149 in *MFG8* to protect against coronary atherosclerosis and related endpoints,  
 49 such as myocardial infarction (MI). This variant is highly enriched in Finland, 70- fold compared to

Non-Finnish Europeans (NFE) in the gnomAD genome reference database<sup>9</sup> with AF of 3% in Finland. This association was also replicated in BioBank Japan (BBJ) and Estonian Biobank (EstBB). We also identified a splice acceptor variant rs201988637 in the same gene, which is also protective against coronary atherosclerosis-related endpoints, indicating that rs534125149 act as a loss-of-function variant in *MFGE8*. Associations of functional variants in *MFGE8* were specific to coronary atherosclerosis-related endpoints, and they did not significantly ( $p < 1.75 \times 10^{-5}$ ) increase risk for any other disease, highlighting *MFGE8* as a potential drug target candidate.

## Material and methods

### Study cohort and data

We studied total of 2 861 disease endpoints in Finnish biobank study FinnGen (n = 260 405) (**Table 1**). FinnGen (<https://www.finngen.fi/en>) is a large biobank study that aims to genotype 500 000 Finns and combine this data with longitudinal registry data, including national hospital discharge, death, and medication reimbursement registries, using unique national personal identification numbers. FinnGen includes prospective epidemiological and disease-based cohorts as well as hospital biobank samples.

### Definition of disease endpoints

All the 2 861 disease-endpoint analysed in FinnGen have been defined based on registry linkage to national hospital discharge, death, and medication reimbursement registries. Diagnoses are based on International Classification of Diseases (ICD) codes and have been harmonized over ICD codes 8, 9 and 10. More detailed lists of the ICD codes used for the disease-endpoints myocardial infarction and coronary atherosclerosis, which are discussed more in this study, are in Supplementary Material. A

complete list of endpoints analysed, and their definitions is available at <https://www.finnngen.fi/en/researchers/clinical-endpoints>.

**Table 1:** Basic characteristics of the study cohort.

|                              | All              | Females           | Males             |
|------------------------------|------------------|-------------------|-------------------|
| N (%)                        | 260 405          | 147 061 (56.47 %) | 113 344 (43.53 %) |
| Age (mean (sd))              | 53.15 (17.55)    | 51.84 (17.71)     | 54.85 (17.19)     |
| BMI (mean (sd)) <sup>a</sup> | 27.29 (5.36)     | 27.21 (5.83)      | 27.38 (4.76)      |
| Statin use (N (%))           | 86 466 (33.2 %)  | 40 422 (27.48 %)  | 46 044 (40.62 %)  |
| Hypertension (N (%))         | 68 005 (26.11 %) | 33 420 (22.72 %)  | 34 585 (30.51 %)  |
| Smoking (N (%)) <sup>b</sup> | 1 733 (1.07 %)   | 901 (0.96 %)      | 832 (1.22 %)      |
| Coronary atherosclerosis     | 28 598 (11.38 %) | 9 252 (6.87 %)    | 19 346 (17.86 %)  |
| Myocardial infarction        | 14 305 (6.04 %)  | 3 958 (2.87 %)    | 10 347 (10.42 %)  |

<sup>a</sup> BMI is available only from 178 966 individuals

<sup>b</sup> Smoking information is available only from 98 654 individuals

## Genotyping and imputation

FinnGen samples were genotyped with multiple Illumina and Affymetrix arrays (Thermo Fisher Scientific, Santa Clara, CA, USA). Genotype calls were made with GenCall and zCall algorithms for Illumina and AxiomGT1 algorithm for Affymetrix chip genotyping data batchwise. Genotyping data produced with previous chip platforms were lifted over to build version 38 (GRCh38/hg38) following the protocol described here: [dx.doi.org/10.17504/protocols.io.nqtdown](https://dx.doi.org/10.17504/protocols.io.nqtdown). Samples with sex discrepancies, high genotype missingness (> 5%), excess heterozygosity ( $\pm 4SD$ ) and non-Finnish ancestry were removed. Variants with high missingness (> 2%), deviation from Hardy–Weinberg equilibrium ( $P < 1 \times 10^{-6}$ ) and low minor allele count ( $MAC < 3$ ) were removed.

90

91 Pre-phasing of genotyped data was performed with Eagle 2.3.5  
 92 (<https://data.broadinstitute.org/alkesgroup/Eagle/>) with the default parameters, except the number of  
 93 conditioning haplotypes was set to 20,000. Imputation of the genotypes was carried out by using the  
 94 population-specific Sequencing Initiative Suomi (SISu) v3 imputation reference panel with Beagle  
 95 4.1 (version 08Jun17.d8b, [https://faculty.washington.edu/browning/beagle/b4\\_1.html](https://faculty.washington.edu/browning/beagle/b4_1.html)) as described  
 96 in the following protocol: [dx.doi.org/10.17504/protocols.io.nmndc5e](https://doi.org/10.17504/protocols.io.nmndc5e). SISu v3 imputation reference  
 97 panel was developed using the high-coverage (25–30x) whole-genome sequencing data generated at  
 98 the Broad Institute of MIT and Harvard and at the McDonnell Genome Institute at Washington  
 99 University, USA; and jointly processed at the Broad Institute. Variant callset was produced with  
 100 Genomic Analysis Toolkit (GATK) HaplotypeCaller algorithm by following GATK best practices  
 101 for variant calling. Genotype-, sample- and variant-wise quality control was applied in an iterative  
 102 manner by using the Hail framework v0.2. The resulting high-quality WGS data for 3 775 individuals  
 103 were phased with Eagle 2.3.5 as described above. As a post-imputation quality control, variants with  
 104 INFO score < 0.7 were excluded.

105

## 106 Association testing

107 A total of 260 405 samples from FinnGen Data Freeze 6 with 2 861 disease endpoints were analyzed  
 108 using Scalable and Accurate Implementation of Generalized mixed model (SAIGE), which uses  
 109 saddlepoint approximation (SPA) to calibrate unbalanced case-control ratios<sup>10</sup>. Models were adjusted  
 110 for age, sex, genotyping batch and first ten principal components. All variants reaching genome-wide  
 111 significance p-value threshold of  $5 \times 10^{-8}$  are considered as genome-wide significant (GWS), and all  
 112 disease- endpoints reaching multiple testing corrected (for the number of endpoints tested = 2 861)  
 113 p-value threshold of  $0.05/2\,861 = 1.75 \times 10^{-5}$  were considered as phenome-wide significant (PWS).

114

115 Independent GWS loci for atherosclerosis were determined as adding  $\pm 0.5\text{Mb}$  around each variant  
 116 that reach the genome-wide significance threshold, overlapping regions were merged. The NHGRI-  
 117 EBI GWAS Catalog<sup>11</sup> was used for assessing the novelty of the independent loci with any CVD-  
 118 related endpoint or traditional risk factor for CVD, such as blood lipids, BMI and blood pressure. All  
 119 novel loci for CVD were fine-mapped using FINEMAP<sup>12</sup> to determine the credible sets in each signal.  
 120

121 In Corogene<sup>13</sup> (n = 5 300), a sub-cohort of FinnGen where participants have been collected as patients  
 122 with coronary artery disease CAD) and other related heart diseases, we tested the association of  
 123 rs534125149 with sub-types of coronary heart disease (acute coronary syndrome, stable coronary  
 124 heart disease (CHD) and other heart attacks). The acute coronary syndrome was further divided into  
 125 unstable Angina pectoris, non-ST segment elevation myocardial infarction (NSTEMI) and ST-  
 126 segment elevation myocardial infarction (STEMI). Associations were tested by calculating risk ratios  
 127 (RR) for carriers vs. non-carriers of rs534125149 using non-CHD group always as controls and  
 128 excluding the other tested groups from the analysis. P-values were calculated using  $\chi^2$ - test, and p-  
 129 values < 0.05 were considered significant.

130

## 131 Survival analysis

132  
 133

134 Survival analysis for coronary atherosclerosis and myocardial was performed using GATE<sup>14</sup>, which  
 135 accounts for both population structure and sample relatedness and controls type I error rates even for  
 136 phenotypes with extremely heavy censoring. GATE transforms the likelihood of a multivariate  
 137 Gaussian frailty model to a modified Poisson generalized linear mixed model (GLMM<sup>15, 16</sup>), and to  
 138 obtain well-calibrated p-values for heavily censored phenotypes, GATE uses the SPA to estimate the  
 139 null distribution of the score statistic. For coronary atherosclerosis and myocardial infarction, survival  
 140 time from birth to first diagnose was analyzed for both rs534125149 and rs201988637. Models were

adjusted for age, sex, genotyping batch and first ten principal components, similarly to original GWAS analyses.

## Replication and biomarker analyses

We tested the association of the two *MFGE8* variants (rs534125149 and rs201988637) with quantitative measurements of cardiometabolic relevance or known risk factors for CVD in two sub-cohorts of FinnGen, the population-based national FINRISK study<sup>17</sup> (n = 26 717) and GeneRISK<sup>18</sup> (n = 7 239). The associations were tested across 66 quantitative measurements of cardiometabolic relevance in FINRISK, and for 158 sub-lipid species in GeneRISK. In Young Finns Study (YFS)<sup>19</sup> cohort (n = 1 934), we tested the association of the two variants with three measurements of arterial relevance (carotid artery distensibility, pulse wave velocity and pulse pressure).

In addition to Finnish cohorts described above, we tested the association of the two variants in Estonian Biobank data (EstBB)<sup>20,21</sup>, BioBank Japan (BBJ)<sup>22,23</sup> and UK Biobank (UKBB)<sup>24</sup>. In EstBB (n = 51 388-137 722) we tested the associations of both variants with body mass index (BMI), systolic and diastolic blood pressure (SBP and DBP) and pulse pressure (PP), in BBJ in we tested the association of rs534125149 with 17 known quantitative risk factors for CVD and lastly, in the UKBB we tested the association of rs201988637 with 79 measurements of cardiometabolic relevance. In all of these biomarker analyses, a linear regression model adjusted for age and sex was used and for all quantitative risk factors rank-based inverse normal transformation was applied prior to analysis. Bonferroni corrected p-value threshold for the number of phenotypes tested was used to assess the significance of resulting associations in each cohort.

For biomarkers that showed significant association in any of the cohorts, we performed a meta-analysis across all cohorts the measurement was available. Meta-analysis was performed using



inverse-variance weighted fixed-effects meta-analysis method<sup>25, 26</sup>. Bonferroni corrected p-value for number of traits tested ( $n = 2$ ) was used to assess the significance of resulting associations in meta-analysis.

## Identifying causal variants

We used FINEMAP<sup>12</sup> on the GWAS summary statistics to identify causal variants underlying the associations for MI (strict definition, i.e., only primary diagnoses accepted) and coronary atherosclerosis. FINEMAP analyses were restricted to a  $\pm 1.5$ Mb region around the rs534125149. We assessed variants in the top 95% credible sets, i.e., the sets of variants encompassing at least 95% of the probability of being causal (causal probability) within each causal signal in the genomic region. Credible sets were filtered if minimum linkage disequilibrium (LD,  $r^2$ ) between the variants in the credible set was  $< 0.1$ , i.e., not clearly representing one signal.

## Results

### GWAS results for Coronary Atherosclerosis

We identified a total of 2 302 variants associated (GWS,  $p < 5 \times 10^{-8}$ ) with coronary atherosclerosis (detailed description of the definition of the endpoint is in Supplementary Material). These variants were located in 38 distinct genetic loci (a minimum of 0.5 Mb distance from each other; **Figure 1**). Out of the 38 GWS loci, four (within or near genes *MFGE8*, *TMEM200A*, *PRG3* and *FHL1*) were novel for any CVD-related endpoints or risk factor for CVD compared to the GWAS Catalog<sup>11</sup> [<https://www.ebi.ac.uk/gwas/>] (**Supplementary Table 1**). Lead variants in these novel loci and their characteristics are listed in **Table 2** and locus zoom plots for each of the loci are in **Supplementary Figure 1**.

191 Among the three novel loci for coronary atherosclerosis, the locus near *MFGE8* had the strongest  
 192 association ( $p$ -value =  $2.63 \times 10^{-16}$  for top variant rs534125149). The lead variant is an inframe  
 193 insertion located in the sixth exon in the *MFGE8* gene (**Supplementary Figure 2**) and it is highly  
 194 enriched in the Finnish population compared to NFSEEs (Non-Finnish, Estonian or Swedish  
 195 Europeans). Interestingly, *MFGE8* is mainly expressed in coronary and tibial arteries according to  
 196 data from GTEx v8 (**Supplementary Figure 3**).  
 197

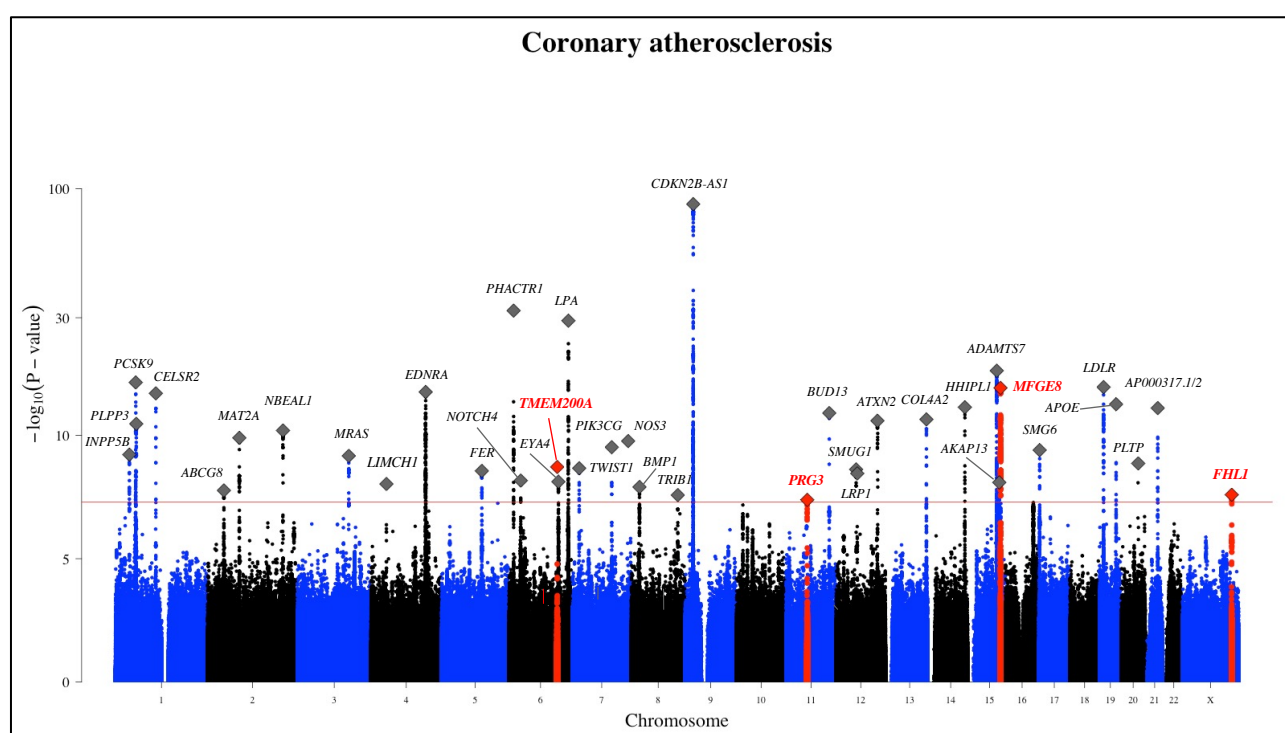

198  
 199 **Figure 1:** GWAS results for coronary atherosclerosis in FinnGen. Total number of independent  
 200 genome-wide significant associations (GWS;  $p < 5 \times 10^{-8}$ ) is 38, the lead variant in each marked with  
 201 diamonds. Four novel associations for CVD-related phenotypes are highlighted with  $\pm 750$  Mb  
 202 around the lead variant in the region as red and the lead variant marked with red diamond.

203  
 204 In addition to *MFGE8*, we identified three additional novel loci to be associated with coronary  
 205 atherosclerosis, *TMT200A*, *PRG3* and *FHL1* being the nearest genes of the lead variants. *TMT200A*  
 206 and *PRG3* loci had one non-coding low-frequency variant reaching the genome-wide significance  
 207 threshold, and *FHL1* had 11. All variants in the credible sets of all these associations were either

intergenic or intronic variants and had no reported significant GWAS associations with any trait in the GWAS Catalog or significant eQTL associations in GTEx. The one variant (rs118042209) in the credible set of *TMEM200A* locus was associated with multiple coronary atherosclerosis related endpoints in FinnGen, including coronary atherosclerosis, ischemic heart disease and angina pectoris, whereas the lead variant in the *PRG3* locus was associated with several cardiomyopathy related endpoints. All variants in the credible set of *FHL1* were associated with multiple coronary atherosclerosis and related endpoints in FinnGen, including angina pectoris and ischemic heart disease. *TMEM200A* have been reported to be associated with ten traits (including height and trauma exposure) and *PRG3* with two traits (eosinophil count and eosinophil percentage of white cells) in the GWAS Catalog. *FHL1* gene had no reported associations in GWAS Catalog.

**Table 2:** Lead variants in novel loci associated with coronary atherosclerosis.

| Lead variant<br>chrom:pos:ref_alt<br>(rsid) | Most severe<br>consequence | Nearest<br>gene | FIN<br>enrichment<br>(NFE) | AF     | OR (P-value)                   | Info | # cs<br>(Post-<br>pr) | # coding<br>in cs(s) |
|---------------------------------------------|----------------------------|-----------------|----------------------------|--------|--------------------------------|------|-----------------------|----------------------|
| chr15:88901702:C_CTGT<br>(rs534125149)      | Inframe<br>insertion       | <i>MFGE8</i>    | 70.59                      | 0.029  | 0.75 (2.60×10 <sup>-16</sup> ) | 0.99 | 2<br>(0.705)          | 1                    |
| chr6:130483492:A_G<br>(rs118042209)         | Intergenic<br>variant      | <i>TMEM200A</i> | 0.87                       | 0.010  | 0.7 (1.90×10 <sup>-9</sup> )   | 0.91 | 1<br>(0.904)          | 0                    |
| chr11:57380633:A:G<br>(rs764568652)         | Intron variant             | <i>PRG3</i>     | - <sup>a</sup>             | 0.0003 | 7.72 (4.10×10 <sup>-8</sup> )  | 0.89 | 1<br>(0.583)          | 0                    |
| chrX:136194941:C_G<br>(rs5974585)           | Intron variant             | <i>FHL1</i>     | 1.25                       | 0.49   | 0.95 (2.55×10 <sup>-8</sup> )  | 0.99 | 1<br>(0.692)          | 0                    |

<sup>a</sup> Variant not present in NFE in gnomAD

In the *PRG3* locus the lead variant is 40.9 kb away from a variant (chr11:57340143:G:A (rs11603691), the p-value for coronary atherosclerosis risk = 0.0269) which has previously been reported to be associated with HDL- cholesterol (HDL-C). However, our association is independent

226 of the previously reported variant rs11603691 (p-value for rs764568652 in a conditional analysis =  
 227  $4.36 \times 10^{-08}$ )

228

229 **Replication and phenome-wide association results for rs534125149**

230 We observed a highly protective association for the Finnish enriched inframe insertion rs534125149  
 231 in the *MFGE8* gene and coronary atherosclerosis related endpoints, including coronary  
 232 atherosclerosis (OR = 0.72 [0.63-0.83],  $p = 7.94 \times 10^{-06}$ ) and myocardial infarction (MI) (OR = 0.69  
 233 [0.58-0.83],  $p = 9.62 \times 10^{-05}$ ) (**Figure 2**). In total, this variant had PWS significant protective effect  
 234 on 14 disease endpoints, all related to coronary atherosclerosis. The majority of these disease  
 235 endpoints are highly overlapping and representing major coronary heart disease (CHD) event. For  
 236 this variant, we did not detect other phenome-wide significant associations among the 2 861  
 237 endpoints in our data. Risk-lowering effect of rs534125149 on CHD was replicated in Biobank  
 238 Japan <sup>22,23</sup> (BBJ) and the Estonian Biobank (EstBB) <sup>21</sup> (35 644 cases and 328 461 controls total: OR  
 239 = 0.754 [0.67-0.84],  $p = 5.41 \times 10^{-7}$ ). Association results for rs534125149 with CHD and MI across  
 240 different cohorts are shown in **Supplementary Figure 4**.

241

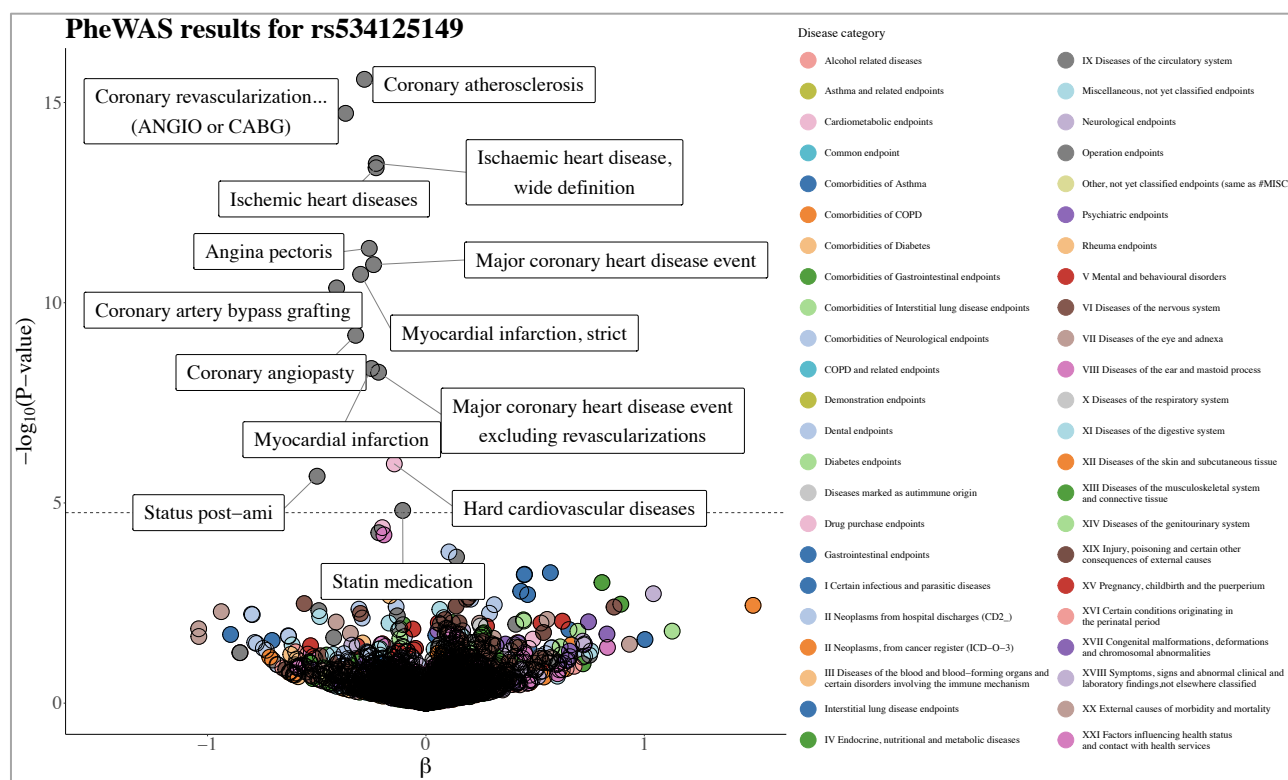

**Figure 2:** Phenome-wide association study (PheWAS) results for rs534125149. Total number of tested endpoints is 2 861 (A complete list of endpoints analyzed and their definitions is available at <https://www.finngen.fi/en/researchers/clinical-endpoints>). The dashed line represents the phenome-wide significance threshold, multiple testing corrected by the number of endpoints =  $0.05/2\,861 = 1.75 \times 10^{-5}$ . All endpoints reaching that threshold are labelled in the figure.

## Splice acceptor variant rs201988637 in *MFGE8*

In addition to inframe insertion rs53412514, we also identified a splice acceptor variant (rs201988637) in *MFGE8* to have a protective effect on coronary atherosclerosis (OR = 0.72 [0.63-0.83],  $p = 7.94 \times 10^{-6}$ ) and related endpoints. The splice acceptor variant had very similar PheWAS profile as the indel (Supplementary Figure 5) and furthermore the two variants had very similar protective effect sizes for the endpoints (Figure 3 and Supplementary Table 1). Similar to rs534125149, this variant is also highly enriched in Finland (37- fold compared to NFE), allele

frequency in Finland being 0.6 %. Moreover, both the splice acceptor and the inframe insertion variants were enriched to Eastern Finland (**Supplementary Figure 6**).

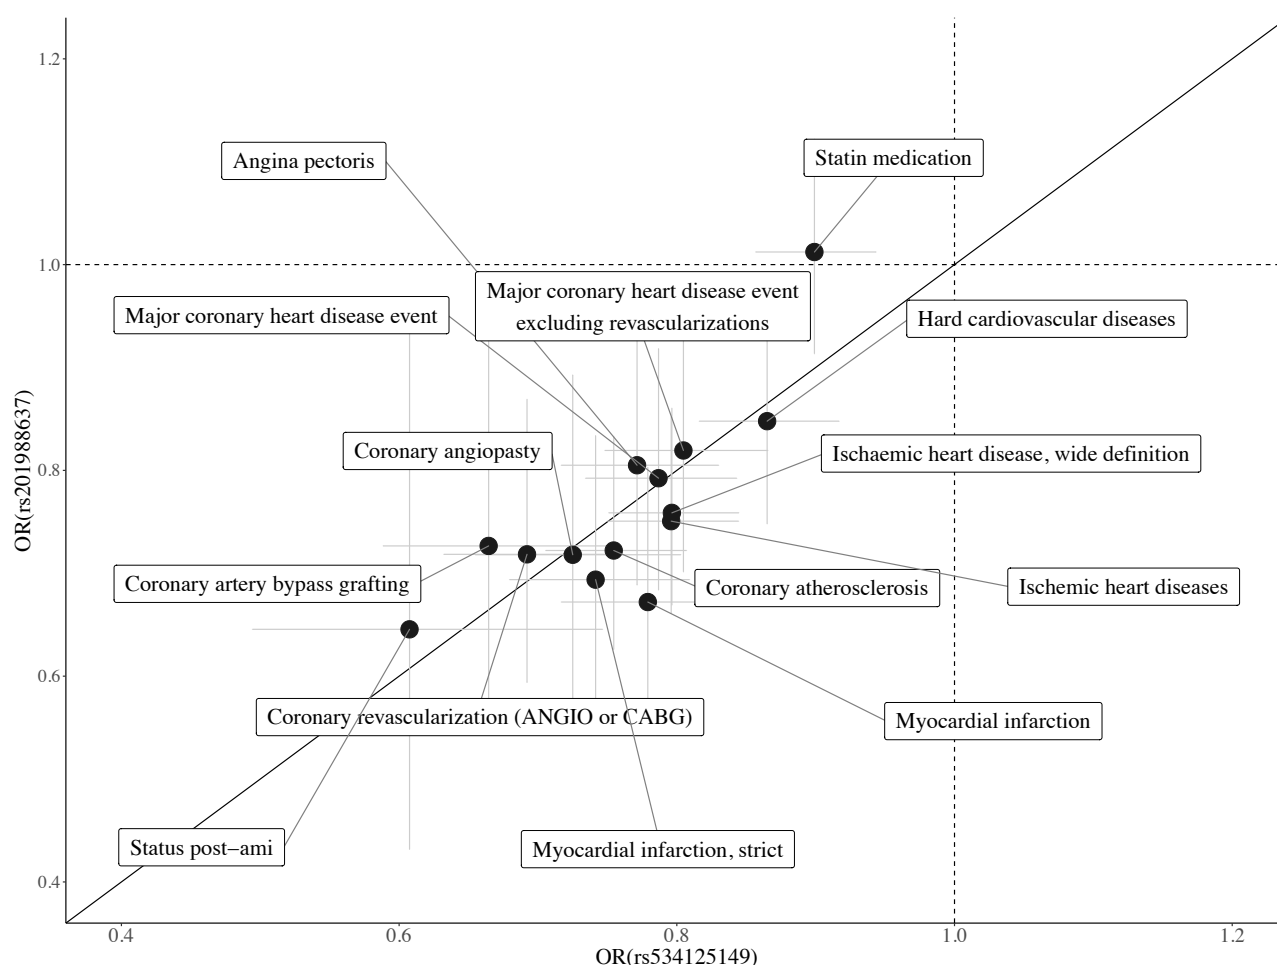

**Figure 3:** Comparison of the effects (OR) of rs534125149 and rs201988637 for 14 endpoints with  $p\text{-value} < 1.75 \times 10^{-5}$  (PWS) for rs534125149. 95% confidence intervals represented as grey lines.

These two variants (rs534125149 and rs201988637) are in low linkage disequilibrium (LD,  $r^2 = 0.00015$ ) and did not have any effect on the other variant's associations with coronary atherosclerosis or MI (**Table 3** and **Supplementary Figure 7**). This indicates that they both have their own, independent protective effect against these endpoints.

**Table 3: Results of the conditional analysis on MI and coronary atherosclerosis.**

| Phenotype                           | SNPID<br>[chr:position:ref:alt]<br>(rsid) | Most severe<br>consequence | Original GWAS results |                        | Conditional results           |                                     |
|-------------------------------------|-------------------------------------------|----------------------------|-----------------------|------------------------|-------------------------------|-------------------------------------|
|                                     |                                           |                            | OR [CI]               | P-value                | OR [CI]                       | P-value                             |
| Coronary<br>atherosclerosis         | chr15:88901702:C:CTGT<br>(rs534125149)    | Inframe<br>insertion       | 0.75 [0.71-0.81]      | $2.63 \times 10^{-16}$ | 0.75 [0.70-0.80] <sup>a</sup> | $7.68 \times 10^{-15}$ <sup>a</sup> |
|                                     | chr15:88899813:T:G<br>(rs201988637)       | Splice acceptor<br>variant | 0.72 [0.63-0.83]      | $7.94 \times 10^{-6}$  | 0.73 [0.64-0.85] <sup>b</sup> | $1.99 \times 10^{-5}$ <sup>b</sup>  |
| Myocardial<br>infarction,<br>strict | chr15:88901702:C:CTGT<br>(rs534125149)    | Inframe<br>insertion       | 0.74 [0.68-0.81]      | $1.95 \times 10^{-11}$ | 0.79 [0.73-0.85] <sup>a</sup> | $1.92 \times 10^{-10}$ <sup>a</sup> |
|                                     | chr15:88899813:T:G<br>(rs201988637)       | Splice acceptor<br>variant | 0.69 [0.58-0.83]      | $9.62 \times 10^{-5}$  | 0.71 [0.59-0.85] <sup>b</sup> | $4.03 \times 10^{-4}$ <sup>b</sup>  |

This table present the conditional analysis results for coronary atherosclerosis and MI (strict definition, only primary diagnoses accepted) where the association has been conditioned on rs534125149 and rs201988637 separately

<sup>a</sup> Conditional on rs201988637

<sup>b</sup> Conditional on rs534125149

## Survival analysis

In addition to protection against coronary atherosclerosis and myocardial infarction, both the inframe insertion rs534125149 and splice acceptor variant rs201988637 showed also significant association in survival analysis when analyzing survival time from birth to first diagnose of coronary atherosclerosis (HR = 0.78 [0.74-0.93]),  $p = 1.67 \times 10^{-17}$  and HR = 0.77 [0.69-0.88],  $p = 5.08 \times 10^{-5}$ , respectively) and myocardial infarction (HR = 0.86 [0.80-0.93],  $p = 2.63 \times 10^{-10}$  and HR = 0.72 [0.61-0.85],  $p = 8.16 \times 10^{-5}$ ). In addition, when combining the heterozygous and homozygous carriers of both rs534125149 and rs201988637 together, carriers get the first diagnose significantly later than non-carriers (HR = 0.81 [0.77-0.85],  $p = 6.4 \times 10^{-16}$  for coronary atherosclerosis and HR = 0.78 [0.72-0.85],  $p = 1.16 \times 10^{-11}$  for MI) (**Figure 4**).

291

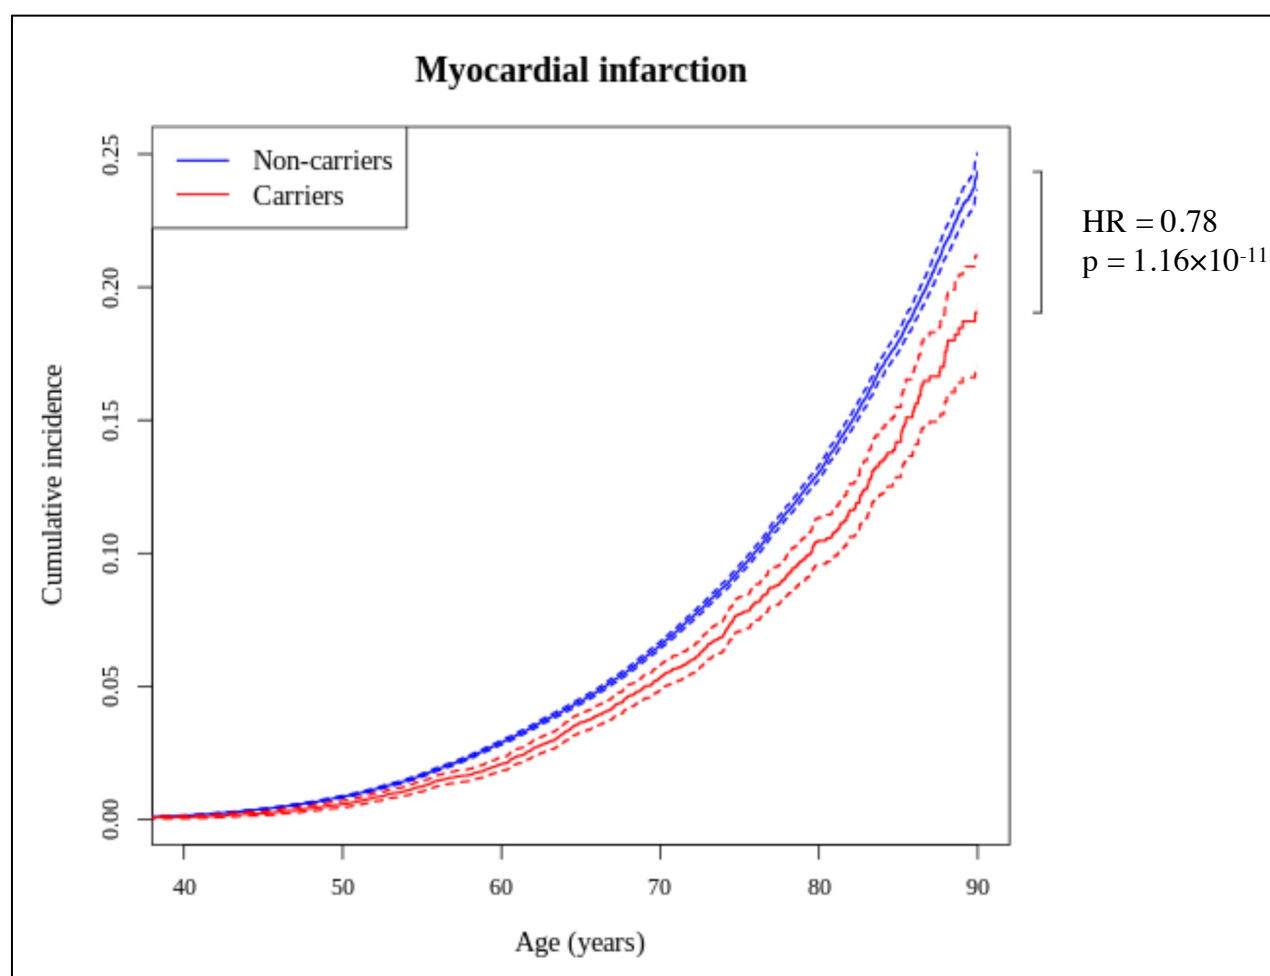

292

293 **Figure 4:** Cumulative incidence plots for myocardial infarction. Red line represents carriers (homo-  
 294 or heterozygous) for either rs534125149 or rs201988637, and blue line represent non-carriers.  
 295 Dashed lines represent 95%- confidence intervals.

296

297 Associations with risk factors for CVD and coronary heart disease sub-types

298 We then tested for possible associations between the *MFGE8* variants and risk factors for CVD.

299 The splice acceptor variant rs201988637 was associated with pulse pressure in analyses across four  
 300 cohorts with pulse pressure measurements and variant rs201988637 available, with the risk  
 301 lowering allele associated with lower pulse pressure ( $p = 1.08 \times 10^{-03}$ ,  $\beta = -1.52 [-2.43 - -0.61]$ )  
 302 mmHg (**Figure 5**). In addition, rs534125149 was significantly associated with height, but further  
 303 analysis pointed this signal to be reflecting the association of a known association of *ACAN* with



304 height, located near *MFGE8* (Supplementary material, **Supplementary Figure 8**). No associations  
305 with other risk factors were observed.  
306  
307 In the Corogene cohort (n = 4 896), rs534125149 significantly ( $p < 0.05$ ) lowers the risk for acute  
308 coronary syndrome and stable coronary heart disease ( $RR = 0.87$  and  $0.83$ , respectively) compared  
309 to healthy controls, but not against other types of heart attack, further pointing to a specific risk-  
310 lowering effect of *MFGE8* on ischemic heart diseases (**Supplementary Figure 9**).  
311  
312 Previously reported common variants near *MFGE8*  
313 Previously, common intergenic variant (rs8042271) near *MFGE8* has been reported to associate with  
314 coronary heart disease (CHD) risk<sup>3, 27</sup>. We replicate this association ( $OR = 0.90$ ,  $p = 3.69 \times 10^{-10}$  for  
315 coronary atherosclerosis) in FinnGen. LD between the common variant rs8042271 and the inframe  
316 insertion rs534125149 is 0.154. The LD characteristics for all 3 variants in *MFGE8* (rs534125149,  
317 rs201988637 and rs8042271) in FinnGen are in **Supplementary Table 2**. Common variant  
318 rs8042271 was in the 95% credible set for MI with the causal probability of 0.003 but was not  
319 included in the 95% credible sets for coronary atherosclerosis (**Supplementary Table 3** and  
320 **Supplementary Table 4**). The conditional analyses of all three *MFGE8* variants showed that the  
321 association of the previously reported common variant rs8042271 can be explained by the inframe  
322 insertion variant rs534125149, but not vice versa, and that the association of the splice acceptor  
323 variant rs201988637 is independent of both rs534125149 and rs8042271 (**Supplementary Table 5**).  
324

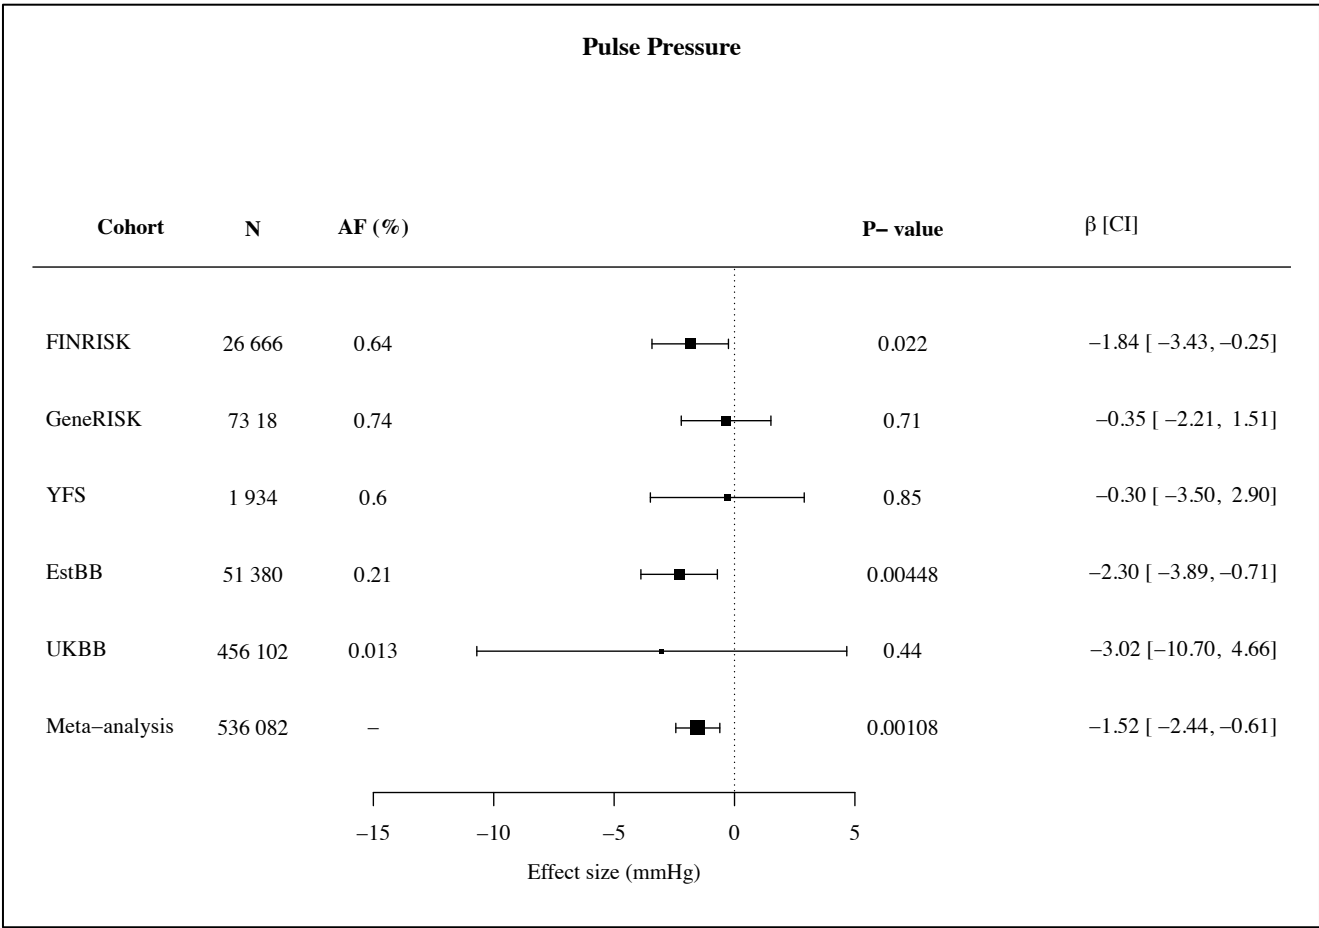

**Figure 5:** Results for pulse pressure association across all cohorts with splice acceptor variant *rs201988637* present.

### Fine-mapping of the *MFGE8* locus

In our fine-mapping analyses, MI had most probably one credible set (set of causal variants) of 32 variants with the highest posterior probability (posterior probability = 0.62), and coronary atherosclerosis had two credible sets of 6 and 45 variants, respectively, with the highest posterior probability (posterior probability = 0.74). For both MI and coronary atherosclerosis, *rs534125149* had the highest probability of being causal (probability of being causal = 0.250 and 0.318, respectively) and was included in the first credible set (Supplementary Table 3, **Supplementary Table 4** and **Supplementary Figure 10**). Splice acceptor variant *rs201988637* was not included in the credible sets for either MI or coronary atherosclerosis, whereas previously reported common

variant rs8042271 was included in the credible set for MI with the probability of being causal = 0.003 (Supplementary Table 3).

## Discussion

Here we show that a loss of function for *MFGE8* leads to 28% lower risk of myocardial infarction and reduces risk for other coronary atherosclerosis-related diseases. The effects are specific to coronary heart disease events and no significant association was observed to other diseases in a phenome-wide search, even if this can be due to lower statistical power in rare disease endpoints. Loss-of-function of *MFGE8* was also associated with lower pulse pressure, but not with blood lipids, blood pressure or other known coronary heart disease risk factors. In addition to *MFGE8*, we report three other novel loci associated with coronary atherosclerosis risk, and to our knowledge we report the first CHD associated locus, *FHL1*, in chromosome X.

Our findings allow us to draw several conclusions. First, *MFGE8* is a potential intervention target with specific effects on coronary heart disease. Specific protective effect with the LoF in *MFGE8* shows potential for efficacy of a treatment targeting MFGE8 protein or downstream products. Second, the lack of risk elevation in other diseases provide evidence on the potential safety of the intervention. Previously, the protective effect of loss-of-function variants have been reported for example for *PCSK9*<sup>5</sup> and *APOC3*<sup>6</sup>, and in phase I, II and III trials, inhibition of PCSK9 have led to significantly decreased LDL-C levels, and in short-term trials, PCSK9 inhibitors have been well-tolerated and have had a low incidence of adverse effects.<sup>28</sup> Based on the phenome-wide association profile for the loss-of-function variant, we hypothesize that inhibiting *MFGE8* could lower the CHD risk.

363 An association of loss-of-function of *MFGE8* with lower pulse pressure, a potential biomarker for  
364 arterial stiffness <sup>29</sup>, are very much in line with previous studies on MFGE8 and the inflammatory  
365 ageing process of the arteries, highlighting the possible role of *MFGE8* in arterial ageing and  
366 stiffness. The *MFGE8* gene encodes Milk-fat globule-EGF 8 (MFGE8), or lactadherin, which is an  
367 integrin-binding glycoprotein implicated in vascular smooth muscle cell (VSMC) proliferation and  
368 invasion, and the secretion of pro-inflammatory molecules <sup>30,31</sup>. Lactadherin is known to play  
369 important roles in several other biological processes, including apoptotic cell clearance and adaptive  
370 immunity <sup>32</sup>, which are known to contribute to the pathogenesis of ischemic stroke. Initially  
371 lactadherin was identified as a bridging molecule between apoptotic cells and phagocytic  
372 macrophages <sup>33-35</sup>, but a growing evidence has indicated that it is a secreted inflammatory mediator  
373 that orchestrates diverse cellular interactions involved in the pathogenesis of various diseases,  
374 including vascular metabolic disorders and some tumors <sup>36-40</sup> and cancers, such as breast <sup>38,41</sup>,  
375 bladder<sup>42</sup>, esophageal<sup>43</sup> and colorectal cancer <sup>44</sup>. Recently, not only has MFG-E8 expression  
376 emerged as a molecular hallmark of adverse cardiovascular remodeling with age <sup>45-48</sup>, but MFG-E8  
377 signaling has also been found to mediate the vascular outcomes of cellular and matrix responses to  
378 the hostile stresses associated with hypertension, diabetes, and atherosclerosis <sup>49-53</sup>.

379

380 Arterial inflammation and remodeling are linked to the pathogenesis of age-associated arterial  
381 diseases, such as atherosclerosis. Recently, lactadherin has been identified as a novel local  
382 biomarker for ageing arterial walls by high-throughput proteomic screening, and it has been shown  
383 to also be an element of the arterial inflammatory signaling network <sup>54</sup>. The transcription,  
384 translation, and signaling levels of MFG-E8 are increased in aged, atherosclerotic, hypertensive,  
385 and diabetic arterial walls in vivo, as well as activated VSMCs and a subset of macrophages in  
386 vitro. During aging, both MFG-E8 transcription and translation increase within the arterial walls  
387 and hearts of various species, including rats, humans, and monkeys<sup>48,55-57</sup>, and MFG-E8 is markedly

up-regulated in rat aortic walls with ageing<sup>48</sup>. High levels of MFG-E8 have also been detected within endothelial cells, SMC, and macrophages of atherosclerotic aortae in both mice and humans<sup>53, 58</sup>. Furthermore, in the advanced atherosclerotic plaques found in murine models, decreased macrophage MFG-E8 levels are associated with an inhibition of apoptotic cell engulfment, leading to the accumulation of cellular debris during the pathogenesis of atherosclerosis. Lastly, lactadherin has shown tissue protection in various models of organ injury, including suppression of inflammation and apoptosis in intestinal ischemia in mice <sup>59</sup>, as well as inducing recovery from ischemia by facilitating angiogenesis <sup>60</sup>.

Our study does, however, have a few limitations. First, our primary association results come from Finnish population with considerable elevation in allele frequency in *MFGE8* variants among Finns. Therefore, the replication of the association in other populations has reduced statistical power. However, there were enough carriers combined in Japanese, Estonian and UK samples to replicate robustly both the protective association with coronary artery disease and for pulse pressure. Secondly, although our data shows association with pulse pressure which has previously been linked to arterial stiffness, the direct effect of the genetic variants on arterial stiffness and arterial aging needs further evidence.

In conclusion, our results show that inhibiting production of lactadherin could reduce the risk for coronary atherosclerosis substantially and thus present *MFGE8* as a potential therapeutic target for atherosclerotic cardiovascular disease. Our study also highlights the potential of FinnGen, as a large-scale biobank study in isolated population to identify high-impact variants either very rare or absent in other populations.

## References

- 413 1. Kessler, T., Erdmann, J. & Schunkert, H. Genetics of coronary artery disease and myocardial  
414 infarction-2013. *Curr. Cardiol. Rep.* **15**, 368 (2013).
- 415 2. O'Donnell, C. J. & Nabel, E. G. Genomics of cardiovascular disease. *N. Engl. J. Med.* **365**, 2098-  
416 2109 (2011).
- 417 3. Nikpay, M. *et al.* A comprehensive 1000 Genomes-based genome-wide association meta-  
418 analysis of coronary artery disease. *Nat. Genet.* **47**, 1121 (2015).
- 419 4. Lim, E. T. *et al.* Distribution and medical impact of loss-of-function variants in the Finnish  
420 founder population. *PLoS genetics* **10** (2014).
- 421 5. Cohen, J. C., Boerwinkle, E., Mosley Jr, T. H. & Hobbs, H. H. Sequence variations in PCSK9,  
422 low LDL, and protection against coronary heart disease. *N. Engl. J. Med.* **354**, 1264-1272 (2006).
- 423 6. TG and HDL Working Group of the Exome Sequencing Project, National Heart, Lung, and  
424 Blood Institute. Loss-of-function mutations in APOC3, triglycerides, and coronary disease. *N. Engl.*  
425 *J. Med.* **371**, 22-31 (2014).
- 426 7. Dewey, F. E. *et al.* Inactivating variants in ANGPTL4 and risk of coronary artery disease. *N.*  
427 *Engl. J. Med.* **374**, 1123-1133 (2016).
- 428 8. Libby, P. *et al.* Lewis EF. *Atherosclerosis. Nature reviews Disease primers* **5**, 56 (2019).
- 429 9. Karczewski, K. J. *et al.* The mutational constraint spectrum quantified from variation in 141,456  
430 humans. *Nature* **581**, 434-443 (2020).
- 431 10. Zhou, W. *et al.* Efficiently controlling for case-control imbalance and sample relatedness in  
432 large-scale genetic association studies. *Nat. Genet.* **50**, 1335-1341 (2018).
- 433 11. Buniello, A. *et al.* The NHGRI-EBI GWAS Catalog of published genome-wide association  
434 studies, targeted arrays and summary statistics 2019. *Nucleic Acids Res.* **47**, D1005-D1012 (2018).
- 435 12. Benner, C. *et al.* FINEMAP: efficient variable selection using summary data from genome-wide  
436 association studies. *Bioinformatics* **32**, 1493-1501 (2016).
- 437 13. Vaara, S. *et al.* Cohort profile: the Corogene study. *Int. J. Epidemiol.* **41**, 1265-1271 (2012).
- 438 14. Dey, R. *et al.* An efficient and accurate frailty model approach for genome-wide survival  
439 association analysis controlling for population structure and relatedness in large-scale biobanks.  
440 *bioRxiv* (2020).
- 441 15. Breslow, N. E. & Clayton, D. G. Approximate inference in generalized linear mixed models.  
442 *Journal of the American statistical Association* **88**, 9-25 (1993).
- 443 16. Chen, H. *et al.* Control for population structure and relatedness for binary traits in genetic  
444 association studies via logistic mixed models. *The American Journal of Human Genetics* **98**, 653-  
445 666 (2016).

- 446 17. Borodulin, K. *et al.* Forty-year trends in cardiovascular risk factors in Finland. *The European*  
447 *Journal of Public Health* **25**, 539-546 (2014).
- 448 18. Widen, E. *et al.* Communicating polygenic and non-genetic risk for atherosclerotic  
449 cardiovascular disease-An observational follow-up study. *medRxiv* (2020).
- 450 19. Raitakari, O. T. *et al.* Cohort profile: the cardiovascular risk in Young Finns Study. *Int. J.*  
451 *Epidemiol.* **37**, 1220-1226 (2008).
- 452 20. Mitt, M. *et al.* Improved imputation accuracy of rare and low-frequency variants using  
453 population-specific high-coverage WGS-based imputation reference panel. *European Journal of*  
454 *Human Genetics* **25**, 869 (2017).
- 455 21. Leitsalu, L. *et al.* Cohort profile: Estonian biobank of the Estonian genome center, university of  
456 Tartu. *Int. J. Epidemiol.* **44**, 1137-1147 (2015).
- 457 22. Nagai, A. *et al.* Overview of the BioBank Japan Project: study design and profile. *Journal of*  
458 *epidemiology* **27**, S2-S8 (2017).
- 459 23. Sakaue, S. *et al.* A global atlas of genetic associations of 220 deep phenotypes. *medRxiv*,  
460 2020.10. 23.20213652 (2021).
- 461 24. Bycroft, C. *et al.* The UK Biobank resource with deep phenotyping and genomic data. *Nature*  
462 **562**, 203 (2018).
- 463 25. Cooper, H., Hedges, L. V. & Valentine, J. C. in *The handbook of research synthesis and meta-*  
464 *analysis* (Russell Sage Foundation, 2019).
- 465 26. Evangelou, E. & Ioannidis, J. P. Meta-analysis methods for genome-wide association studies  
466 and beyond. *Nature Reviews Genetics* **14**, 379-389 (2013).
- 467 27. Soubeyrand, S. *et al.* Regulation of MFGE8 by the intergenic coronary artery disease locus on  
468 15q26. 1. *Atherosclerosis* **284**, 11-17 (2019).
- 469 28. Dadu, R. T. & Ballantyne, C. M. Lipid lowering with PCSK9 inhibitors. *Nature Reviews*  
470 *Cardiology* **11**, 563 (2014).
- 471 29. Benetos, A. *et al.* Mortality and cardiovascular events are best predicted by low  
472 central/peripheral pulse pressure amplification but not by high blood pressure levels in elderly  
473 nursing home subjects: the PARTAGE (Predictive Values of Blood Pressure and Arterial Stiffness  
474 in Institutionalized Very Aged Population) study. *J. Am. Coll. Cardiol.* **60**, 1503-1511 (2012).
- 475 30. Oshima, K. *et al.* Lactation-Dependent Expression of an mRNA Splice Variant with an Exon for  
476 a Multiply O-Glycosylated Domain of Mouse Milk Fat Globule Glycoprotein MFG-E8. *Biochem.*  
477 *Biophys. Res. Commun.* **254**, 522-528 (1999).
- 478 31. Aoki, N. *et al.* Immunologically cross-reactive 57 kDa and 53 kDa glycoprotein antigens of  
479 bovine milk fat globule membrane: isoforms with different N-linked sugar chains and differential  
480 glycosylation at early stages of lactation. *Biochimica et Biophysica Acta (BBA)-General Subjects*  
481 **1200**, 227-234 (1994).



482 32. Deroide, N. *et al.* MFG-E8 inhibits inflammasome-induced IL-1 $\beta$  production and limits  
483 postischemic cerebral injury. *J. Clin. Invest.* **123**, 1176-1181 (2013).

484 33. Hanayama, R. *et al.* Identification of a factor that links apoptotic cells to phagocytes. *Nature*  
485 **417**, 182-187 (2002).

486 34. Hanayama, R. *et al.* Autoimmune disease and impaired uptake of apoptotic cells in MFG-E8-  
487 deficient mice. *Science* **304**, 1147-1150 (2004).

488 35. Yoshida, H. *et al.* Phosphatidylserine-dependent engulfment by macrophages of nuclei from  
489 erythroid precursor cells. *Nature* **437**, 754-758 (2005).

490 36. Tahara, H. *et al.* Emerging concepts in biomarker discovery; the US-Japan Workshop on  
491 Immunological Molecular Markers in Oncology. *Journal of Translational Medicine* **7**, 1-25 (2009).

492 37. Neutzner, M. *et al.* MFG-E8/lactadherin promotes tumor growth in an angiogenesis-dependent  
493 transgenic mouse model of multistage carcinogenesis. *Cancer Res.* **67**, 6777-6785 (2007).

494 38. TAYLOR, M. R., COUTO, J. R., SCALLAN, C. D., CERIANI, R. L. & PETERSON, J. A.  
495 Lactadherin (formerly BA46), a membrane-associated glycoprotein expressed in human milk and  
496 breast carcinomas, promotes Arg-Gly-Asp (RGD)-dependent cell adhesion. *DNA Cell Biol.* **16**, 861-  
497 869 (1997).

498 39. Jinushi, M. *et al.* Milk fat globule EGF-8 promotes melanoma progression through coordinated  
499 Akt and twist signaling in the tumor microenvironment. *Cancer Res.* **68**, 8889-8898 (2008).

500 40. Raymond, A., Ensslin, M. A. & Shur, B. D. SED1/MFG-E8: a bi-motif protein that orchestrates  
501 diverse cellular interactions. *J. Cell. Biochem.* **106**, 957-966 (2009).

502 41. Yu, L. *et al.* MFG-E8 overexpression is associated with poor prognosis in breast cancer  
503 patients. *Pathology-Research and Practice* **215**, 490-498 (2019).

504 42. Sugano, G. *et al.* Milk fat globule—epidermal growth factor—factor VIII (MFG-E8)/lactadherin  
505 promotes bladder tumor development. *Oncogene* **30**, 642-653 (2011).

506 43. Kanemura, T. *et al.* Immunoregulatory influence of abundant MFG-E8 expression by  
507 esophageal cancer treated with chemotherapy. *Cancer science* **109**, 3393-3402 (2018).

508 44. Jia, M. *et al.* Prognostic correlation between MFG-E8 expression level and colorectal Cancer.  
509 *Arch. Med. Res.* **48**, 270-275 (2017).

510 45. Wang, M., Khazan, B. & G Lakatta, E. Central arterial aging and angiotensin II signaling.  
511 *Current hypertension reviews* **6**, 266-281 (2010).

512 46. Wang, M., Monticone, R. E. & Lakatta, E. G. Arterial aging: a journey into subclinical arterial  
513 disease. *Curr. Opin. Nephrol. Hypertens.* **19**, 201 (2010).

514 47. Ortiz, A. *et al.* Clinical usefulness of novel prognostic biomarkers in patients on hemodialysis.  
515 *Nature reviews Nephrology* **8**, 141 (2012).



- 516 48. Fu, Z. *et al.* Milk fat globule protein epidermal growth factor-8: a pivotal relay element within  
517 the angiotensin II and monocyte chemoattractant protein-1 signaling cascade mediating vascular  
518 smooth muscle cells invasion. *Circ. Res.* **104**, 1337-1346 (2009).
- 519 49. Bagnato, C. *et al.* Proteomics analysis of human coronary atherosclerotic plaque: a feasibility  
520 study of direct tissue proteomics by liquid chromatography and tandem mass spectrometry.  
521 *Molecular & Cellular Proteomics* **6**, 1088-1102 (2007).
- 522 50. Li, X. *et al.* Proteomics approach to study the mechanism of action of grape seed  
523 proanthocyanidin extracts on arterial remodeling in diabetic rats. *Int. J. Mol. Med.* **25**, 237-248  
524 (2010).
- 525 51. Strøm, C. C. *et al.* Identification of a core set of genes that signifies pathways underlying  
526 cardiac hypertrophy. *Comp. Funct. Genomics* **5**, 459-470 (2004).
- 527 52. Lin, Y. *et al.* Comparative proteomic analysis of rat aorta in a subtotal nephrectomy model.  
528 *Proteomics* **10**, 2429-2443 (2010).
- 529 53. Ait-Oufella, H. *et al.* CLINICAL PERSPECTIVE. *Circulation* **115**, 2168-2177 (2007).
- 530 54. Wang, M., H Wang, H. & G Lakatta, E. Milk fat globule epidermal growth factor VIII signaling  
531 in arterial wall remodeling. *Current vascular pharmacology* **11**, 768-776 (2013).
- 532 55. Peng, S., Glennert, J. & Westermark, P. Medin-amyloid: a recently characterized age-associated  
533 arterial amyloid form affects mainly arteries in the upper part of the body. *Amyloid* **12**, 96-102  
534 (2005).
- 535 56. Peng, S. *et al.* Medin and medin-amyloid in ageing inflamed and non-inflamed temporal  
536 arteries. *The Journal of Pathology: A Journal of the Pathological Society of Great Britain and*  
537 *Ireland* **196**, 91-96 (2002).
- 538 57. Grant, J. E. *et al.* Quantification of protein expression changes in the aging left ventricle of  
539 *Rattus norvegicus*. *Journal of proteome research* **8**, 4252-4263 (2009).
- 540 58. Bagnato, C. *et al.* Proteomics analysis of human coronary atherosclerotic plaque: a feasibility  
541 study of direct tissue proteomics by liquid chromatography and tandem mass spectrometry.  
542 *Molecular & Cellular Proteomics* **6**, 1088-1102 (2007).
- 543 59. Cheyuo, C. *et al.* Recombinant human MFG-E8 attenuates cerebral ischemic injury: its role in  
544 anti-inflammation and anti-apoptosis. *Neuropharmacology* **62**, 890-900 (2012).
- 545 60. Silvestre, J. *et al.* Lactadherin promotes VEGF-dependent neovascularization. *Nat. Med.* **11**,  
546 499-506 (2005).

547

## 548 Acknowledgements

549

We would like to thank all participants of all study cohorts for their generous participation. We also want to thank Dr. Kaoru Ito at RIKEN Center for Integrative Medical Sciences for supporting the study. This work was supported by the Academy of Finland Center of Excellence in Complex Disease Genetics (Grant No 312062 and 336820 to S.R.), the Finnish Foundation for Cardiovascular Research, the Sigrid Juselius Foundation, University of Helsinki HiLIFE Fellow, Grand Challenge grants and Horizon 2020 Research and Innovation Programme (grant number 101016775 “INTERVENE” to S.R.), Academy of Finland grant number 331671 to N.M., the European Union through the European Regional Development Fund (Project No. 2014-2020.4.01.16-0125 to L.M.), the Estonian Research Council grant PRG184 [to L.M.] and the Doctoral Programme in Population Health, University of Helsinki [to S.E.R.].

The FinnGen project is funded by two grants from Business Finland (HUS 4685/31/2016 and UH 4386/31/2016) and the following industry partners: AbbVie Inc., AstraZeneca UK Ltd, Biogen MA Inc., Celgene Corporation, Celgene International II Sàrl, Genentech Inc., Merck Sharp & Dohme Corp, Pfizer Inc., GlaxoSmithKline Intellectual Property Development Ltd., Sanofi US Services Inc., Maze Therapeutics Inc., Janssen Biotech Inc, and Novartis AG. Following biobanks are acknowledged for delivering biobank samples to FinnGen: Auria Biobank ([www.auria.fi/biopankki](http://www.auria.fi/biopankki)), THL Biobank ([www.thl.fi/biobank](http://www.thl.fi/biobank)), Helsinki Biobank ([www.helsinginbiopankki.fi](http://www.helsinginbiopankki.fi)), Biobank Borealis of Northern Finland (<https://www.ppshep.fi/Tutkimus-ja-opetus/Biopankki/Pages/Biopankki-Borealis-briefly-in-English.aspx>), Finnish Clinical Biobank Tampere ([www.tays.fi/en-US/Research\\_and\\_development/Finnish\\_Clinical\\_Biobank\\_Tampere](http://www.tays.fi/en-US/Research_and_development/Finnish_Clinical_Biobank_Tampere)), Biobank of Eastern Finland ([www.ita-suomenbiopankki.fi/en](http://www.ita-suomenbiopankki.fi/en)), Central Finland Biobank ([www.ksshp.fi/fi-FI/Potilaille/Biopankki](http://www.ksshp.fi/fi-FI/Potilaille/Biopankki)), Finnish Red Cross Blood Service Biobank ([www.veripalvelu.fi/verenluovutus/biopankkitoiminta](http://www.veripalvelu.fi/verenluovutus/biopankkitoiminta)) and Terveystalo Biobank

574 ([www.terveystalo.com/fi/Yritystietoa/Terveystalo-Biopankki/Biopankki/](http://www.terveystalo.com/fi/Yritystietoa/Terveystalo-Biopankki/Biopankki/)). All Finnish Biobanks are  
575 members of BBMRI.fi infrastructure ([www.bbmri.fi](http://www.bbmri.fi)) and FinBB (<https://finbb.fi/>).  
576

## 577 Estonian Biobank research team

578 Tõnu Esko,  
579 Andres Metspalu,  
580 Reedik Mägi,  
581 Mari Nelis  
582

## 583 Contributors of FinnGen

### 584 Steering Committee

585 Aarno Palotie      Institute for Molecular Medicine Finland, HiLIFE, University of Helsinki, Finland  
586 Mark Daly        Institute for Molecular Medicine Finland, HiLIFE, University of Helsinki, Finland  
587

### 588 Pharmaceutical companies

589 Bridget Riley-Gills      Abbvie, Chicago, IL, United States  
590 Howard Jacob            Abbvie, Chicago, IL, United States  
591 Dirk Paul                Astra Zeneca, Cambridge, United Kingdom  
592 Heiko Runz              Biogen, Cambridge, MA, United States  
593 Sally John                Biogen, Cambridge, MA, United States  
594 Robert Plenge            Celgene, Summit, NJ, United States/Bristol Myers Squibb, New York, NY, United States  
595 Mark McCarthy          Genentech, San Francisco, CA, United States  
596 Julie Hunkapiller        Genentech, San Francisco, CA, United States  
597 Meg Ehm                 GlaxoSmithKline, Brentford, United Kingdom  
598 Kirsi Auro                GlaxoSmithKline, Brentford, United Kingdom  
599 Caroline Fox              Merck, Kenilworth, NJ, United States  
600 Anders Mälarstig        Pfizer, New York, NY, United States  
601 Katherine Klinger        Sanofi, Paris, France  
602 Deepak Raipal            Sanofi, Paris, France

|     |                                              |                                                                                               |
|-----|----------------------------------------------|-----------------------------------------------------------------------------------------------|
| 603 | Tim Behrens                                  | Maze Therapeutics, San Francisco, CA, United States                                           |
| 604 | Robert Yang                                  | Janssen Biotech, Beerse, Belgium                                                              |
| 605 | Richard Siegel                               | Novartis, Basel, Switzerland                                                                  |
| 606 | <b>University of Helsinki &amp; Biobanks</b> |                                                                                               |
| 607 | Tomi Mäkelä                                  | HiLIFE, University of Helsinki, Finland, Finland                                              |
| 608 | Jaakko Kaprio                                | Institute for Molecular Medicine Finland, HiLIFE, Helsinki, Finland, Finland                  |
| 609 | Petri Virolainen                             | Auria Biobank / University of Turku / Hospital District of Southwest Finland, Turku,          |
| 610 | Finland                                      |                                                                                               |
| 611 | Antti Hakanen                                | Auria Biobank / University of Turku / Hospital District of Southwest Finland, Turku,          |
| 612 | Finland                                      |                                                                                               |
| 613 | Terhi Kilpi                                  | THL Biobank / The National Institute of Health and Welfare Helsinki, Finland                  |
| 614 | Markus Perola                                | THL Biobank / The National Institute of Health and Welfare Helsinki, Finland                  |
| 615 | Jukka Partanen                               | Finnish Red Cross Blood Service / Finnish Hematology Registry and Clinical Biobank,           |
| 616 | Helsinki, Finland                            |                                                                                               |
| 617 | Anne Pitkäranta                              | Helsinki Biobank / Helsinki University and Hospital District of Helsinki and Uusimaa,         |
| 618 | Helsinki                                     |                                                                                               |
| 619 | Juhani Junttila                              | Northern Finland Biobank Borealis / University of Oulu / Northern Ostrobothnia Hospital       |
| 620 | District, Oulu, Finland                      |                                                                                               |
| 621 | Raisa Serpi                                  | Northern Finland Biobank Borealis / University of Oulu / Northern Ostrobothnia Hospital       |
| 622 | District, Oulu, Finland                      |                                                                                               |
| 623 | Tarja Laitinen                               | Finnish Clinical Biobank Tampere / University of Tampere / Pirkanmaa Hospital District,       |
| 624 | Tampere, Finland                             |                                                                                               |
| 625 | Johanna Mäkelä                               | Finnish Clinical Biobank Tampere / University of Tampere / Pirkanmaa Hospital District,       |
| 626 | Tampere, Finland                             |                                                                                               |
| 627 | Veli-Matti Kosma                             | Biobank of Eastern Finland / University of Eastern Finland / Northern Savo Hospital District, |
| 628 | Kuopio, Finland                              |                                                                                               |
| 629 | Urho Kujala                                  | Central Finland Biobank / University of Jyväskylä / Central Finland Health Care District,     |
| 630 | Jyväskylä, Finland                           |                                                                                               |
| 631 |                                              |                                                                                               |
| 632 | <b>Other Experts/ Non-Voting Members</b>     |                                                                                               |

|     |                                              |                                                                                      |
|-----|----------------------------------------------|--------------------------------------------------------------------------------------|
| 633 | Outi Tuovila                                 | Business Finland, Helsinki, Finland                                                  |
| 634 | Raimo Pakkanen                               | Business Finland, Helsinki, Finland                                                  |
| 635 |                                              |                                                                                      |
| 636 | <b>Scientific Committee</b>                  |                                                                                      |
| 637 | <b>Pharmaceutical companies</b>              |                                                                                      |
| 638 | Jeffrey Waring                               | Abbvie, Chicago, IL, United States                                                   |
| 639 | Ali Abbasi                                   | Abbvie, Chicago, IL, United States                                                   |
| 640 | Mengzhen Liu                                 | Abbvie, Chicago, IL, United States                                                   |
| 641 | Ioanna Tachmazidou                           | Astra Zeneca, Cambridge, United Kingdom                                              |
| 642 | Chia-Yen Chen                                | Biogen, Cambridge, MA, United States                                                 |
| 643 | Heiko Runz                                   | Biogen, Cambridge, MA, United States                                                 |
| 644 | Shameek Biswas                               | Celgene, Summit, NJ, United States/Bristol Myers Squibb, New York, NY, United States |
| 645 | Julie Hunkapiller                            | Genentech, San Francisco, CA, United States                                          |
| 646 | Meg Ehm                                      | GlaxoSmithKline, Brentford, United Kingdom                                           |
| 647 | Neha Raghavan                                | Merck, Kenilworth, NJ, United States                                                 |
| 648 | Adriana Huertas-Vazquez                      | Merck, Kenilworth, NJ, United States                                                 |
| 649 | Anders Mälarstig                             | Pfizer, New York, NY, United States                                                  |
| 650 | Xinli Hu                                     | Pfizer, New York, NY, United States                                                  |
| 651 | Katherine Klinger                            | Sanofi, Paris, France                                                                |
| 652 | Matthias Gossel                              | Sanofi, Paris, France                                                                |
| 653 | Robert Graham                                | Maze Therapeutics, San Francisco, CA, United States                                  |
| 654 | Tim Behrens                                  | Maze Therapeutics, San Francisco, CA, United States                                  |
| 655 | Beryl Cummings                               | Maze Therapeutics, San Francisco, CA, United States                                  |
| 656 | Wilco Fleuren                                | Janssen Biotech, Beerse, Belgium                                                     |
| 657 | Dawn Waterworth                              | Janssen Biotech, Beerse, Belgium                                                     |
| 658 | Nicole Renaud                                | Novartis, Basel, Switzerland                                                         |
| 659 | Ma'en Obeidat                                | Novartis, Basel, Switzerland                                                         |
| 660 |                                              |                                                                                      |
| 661 | <b>University of Helsinki &amp; Biobanks</b> |                                                                                      |
| 662 | Samuli Ripatti                               | Institute for Molecular Medicine Finland, HiLIFE, Helsinki, Finland                  |

|     |                           |                                                                                           |
|-----|---------------------------|-------------------------------------------------------------------------------------------|
| 663 | Johanna Schleutker        | Auria Biobank / Univ. of Turku / Hospital District of Southwest Finland, Turku, Finland   |
| 664 | Markus Perola             | THL Biobank / The National Institute of Health and Welfare Helsinki, Finland              |
| 665 | Mikko Arvas               | Finnish Red Cross Blood Service / Finnish Hematology Registry and Clinical Biobank,       |
| 666 | Helsinki, Finland         |                                                                                           |
| 667 | Olli Carpén               | Helsinki Biobank / Helsinki University and Hospital District of Helsinki and Uusimaa,     |
| 668 | Helsinki                  |                                                                                           |
| 669 | Reetta Hinttala           | Northern Finland Biobank Borealis / University of Oulu / Northern Ostrobothnia Hospital   |
| 670 | District, Oulu, Finland   |                                                                                           |
| 671 | Johannes Kettunen         | Northern Finland Biobank Borealis / University of Oulu / Northern Ostrobothnia Hospital   |
| 672 | District, Oulu, Finland   |                                                                                           |
| 673 | Johanna Mäkelä            | Finnish Clinical Biobank Tampere / University of Tampere / Pirkanmaa Hospital District,   |
| 674 | Tampere, Finland          |                                                                                           |
| 675 | Arto Mannermaa            | Biobank of Eastern Finland / University of Eastern Finland / Northern Savo Hospital       |
| 676 | District, Kuopio, Finland |                                                                                           |
| 677 | Jari Laukkanen            | Central Finland Biobank / University of Jyväskylä / Central Finland Health Care District, |
| 678 | Jyväskylä, Finland        |                                                                                           |
| 679 | Urho Kujala               | Central Finland Biobank / University of Jyväskylä / Central Finland Health Care District, |
| 680 | Jyväskylä, Finland        |                                                                                           |
| 681 |                           |                                                                                           |
| 682 | <b>Clinical Groups</b>    |                                                                                           |
| 683 | <b>Neurology Group</b>    |                                                                                           |
| 684 | Reetta Kälviäinen         | Northern Savo Hospital District, Kuopio, Finland                                          |
| 685 | Valtteri Julkunen         | Northern Savo Hospital District, Kuopio, Finland                                          |
| 686 | Hilkka Soininen           | Northern Savo Hospital District, Kuopio, Finland                                          |
| 687 | Anne Remes                | Northern Ostrobothnia Hospital District, Oulu, Finland                                    |
| 688 | Mikko Hiltunen            | Northern Savo Hospital District, Kuopio, Finland                                          |
| 689 | Jukka Peltola             | Pirkanmaa Hospital District, Tampere, Finland                                             |
| 690 | Pentti Tienari            | Hospital District of Helsinki and Uusimaa, Helsinki, Finland                              |
| 691 | Juha Rinne                | Hospital District of Southwest Finland, Turku, Finland                                    |
| 692 | Roosa Kallionpää          | Hospital District of Southwest Finland, Turku, Finland                                    |

|     |                               |                                                                                       |
|-----|-------------------------------|---------------------------------------------------------------------------------------|
| 693 | Ali Abbasi                    | Abbvie, Chicago, IL, United States                                                    |
| 694 | Adam Ziemann                  | Abbvie, Chicago, IL, United States                                                    |
| 695 | Jeffrey Waring                | Abbvie, Chicago, IL, United States                                                    |
| 696 | Sahar Esmaeeli                | Abbvie, Chicago, IL, United States                                                    |
| 697 | Nizar Smaoui                  | Abbvie, Chicago, IL, United States                                                    |
| 698 | Anne Lehtonen                 | Abbvie, Chicago, IL, United States                                                    |
| 699 | Susan Eaton                   | Biogen, Cambridge, MA, United States                                                  |
| 700 | Heiko Runz                    | Biogen, Cambridge, MA, United States                                                  |
| 701 | Sanni Lahdenperä              | Biogen, Cambridge, MA, United States                                                  |
| 702 | Janet van Adelsberg           | Celgene, Summit, NJ, United States/ Bristol Myers Squibb, New York, NY, United States |
| 703 | Shameek Biswas                | Celgene, Summit, NJ, United States/ Bristol Myers Squibb, New York, NY, United States |
| 704 | Julie Hunkapiller             | Genentech, San Francisco, CA, United States                                           |
| 705 | Natalie Bowers                | Genentech, San Francisco, CA, United States                                           |
| 706 | Edmond Teng                   | Genentech, San Francisco, CA, United States                                           |
| 707 | Sarah Pendergrass             | Genentech, San Francisco, CA, United States                                           |
| 708 | Onuralp Soylemez              | Merck, Kenilworth, NJ, United States                                                  |
| 709 | Kari Linden                   | Pfizer, New York, NY, United States                                                   |
| 710 | Fanli Xu                      | GlaxoSmithKline, Brentford, United Kingdom                                            |
| 711 | David Pulford                 | GlaxoSmithKline, Brentford, United Kingdom                                            |
| 712 | Kirsi Auro                    | GlaxoSmithKline, Brentford, United Kingdom                                            |
| 713 | Laura Addis                   | GlaxoSmithKline, Brentford, United Kingdom                                            |
| 714 | John Eicher                   | GlaxoSmithKline, Brentford, United Kingdom                                            |
| 715 | Minna Raivio                  | Hospital District of Helsinki and Uusimaa, Helsinki, Finland                          |
| 716 | Sarah Pendergrass             | Genentech, San Francisco, CA, United States                                           |
| 717 | Beryl Cummings                | Maze Therapeutics, San Francisco, CA, United States                                   |
| 718 | Juulia Partanen               | Institute for Molecular Medicine Finland, HiLIFE, University of Helsinki, Finland     |
| 719 |                               |                                                                                       |
| 720 | <b>Gastroenterology Group</b> |                                                                                       |
| 721 | Martti Färkkilä               | Hospital District of Helsinki and Uusimaa, Helsinki, Finland                          |
| 722 | Jukka Koskela                 | Hospital District of Helsinki and Uusimaa, Helsinki, Finland                          |

|     |                           |                                                                                       |
|-----|---------------------------|---------------------------------------------------------------------------------------|
| 723 | Sampsa Pikkarainen        | Hospital District of Helsinki and Uusimaa, Helsinki, Finland                          |
| 724 | Airi Jussila              | Pirkanmaa Hospital District, Tampere, Finland                                         |
| 725 | Katri Kaukinen            | Pirkanmaa Hospital District, Tampere, Finland                                         |
| 726 | Timo Blomster             | Northern Ostrobothnia Hospital District, Oulu, Finland                                |
| 727 | Mikko Kiviniemi           | Northern Savo Hospital District, Kuopio, Finland                                      |
| 728 | Markku Voutilainen        | Hospital District of Southwest Finland, Turku, Finland                                |
| 729 | Ali Abbasi                | Abbvie, Chicago, IL, United States                                                    |
| 730 | Graham Heap               | Abbvie, Chicago, IL, United States                                                    |
| 731 | Jeffrey Waring            | Abbvie, Chicago, IL, United States                                                    |
| 732 | Nizar Smaoui              | Abbvie, Chicago, IL, United States                                                    |
| 733 | Fedik Rahimov             | Abbvie, Chicago, IL, United States                                                    |
| 734 | Anne Lehtonen             | Abbvie, Chicago, IL, United States                                                    |
| 735 | Keith Usiskin             | Celgene, Summit, NJ, United States/ Bristol Myers Squibb, New York, NY, United States |
| 736 | Tim Lu                    | Genentech, San Francisco, CA, United States                                           |
| 737 | Natalie Bowers            | Genentech, San Francisco, CA, United States                                           |
| 738 | Danny Oh                  | Genentech, San Francisco, CA, United States                                           |
| 739 | Sarah Pendergrass         | Genentech, San Francisco, CA, United States                                           |
| 740 | Kirsi Kalpala             | Pfizer, New York, NY, United States                                                   |
| 741 | Melissa Miller            | Pfizer, New York, NY, United States                                                   |
| 742 | Xinli Hu                  | Pfizer, New York, NY, United States                                                   |
| 743 | Linda McCarthy            | GlaxoSmithKline, Brentford, United Kingdom                                            |
| 744 | Onuralp Soylemez          | Merck, Kenilworth, NJ, United States                                                  |
| 745 | Mark Daly                 | Institute for Molecular Medicine Finland, HiLIFE, University of Helsinki, Finland     |
| 746 |                           |                                                                                       |
| 747 | <b>Rheumatology Group</b> |                                                                                       |
| 748 | Kari Eklund               | Hospital District of Helsinki and Uusimaa, Helsinki, Finland                          |
| 749 | Antti Palomäki            | Hospital District of Southwest Finland, Turku, Finland                                |
| 750 | Pia Isomäki               | Pirkanmaa Hospital District, Tampere, Finland                                         |
| 751 | Laura Pirilä              | Hospital District of Southwest Finland, Turku, Finland                                |
| 752 | Oili Kaipainen-Seppänen   | Northern Savo Hospital District, Kuopio, Finland                                      |



|     |                          |                                                                                       |
|-----|--------------------------|---------------------------------------------------------------------------------------|
| 753 | Johanna Huhtakangas      | Northern Ostrobothnia Hospital District, Oulu, Finland                                |
| 754 | Ali Abbasi               | Abbvie, Chicago, IL, United States                                                    |
| 755 | Jeffrey Waring           | Abbvie, Chicago, IL, United States                                                    |
| 756 | Fedik Rahimov            | Abbvie, Chicago, IL, United States                                                    |
| 757 | Apinya Lertratanakul     | Abbvie, Chicago, IL, United States                                                    |
| 758 | Nizar Smaoui             | Abbvie, Chicago, IL, United States                                                    |
| 759 | Anne Lehtonen            | Abbvie, Chicago, IL, United States                                                    |
| 760 | David Close              | Astra Zeneca, Cambridge, United Kingdom                                               |
| 761 | Marla Hochfeld           | Celgene, Summit, NJ, United States/ Bristol Myers Squibb, New York, NY, United States |
| 762 | Natalie Bowers           | Genentech, San Francisco, CA, United States                                           |
| 763 | Sarah Pendergrass        | Genentech, San Francisco, CA, United States                                           |
| 764 | Onuralp Soylemez         | Merck, Kenilworth, NJ, United States                                                  |
| 765 | Kirsi Kalpala            | Pfizer, New York, NY, United States                                                   |
| 766 | Nan Bing                 | Pfizer, New York, NY, United States                                                   |
| 767 | Xinli Hu                 | Pfizer, New York, NY, United States                                                   |
| 768 | Jorge Esparza Gordillo   | GlaxoSmithKline, Brentford, United Kingdom                                            |
| 769 | Kirsi Auro               | GlaxoSmithKline, Brentford, United Kingdom                                            |
| 770 | Dawn Waterworth          | Janssen Biotech, Beerse, Belgium                                                      |
| 771 | Nina Mars                | Institute for Molecular Medicine Finland, HiLIFE, Helsinki, Finland                   |
| 772 |                          |                                                                                       |
| 773 | <b>Pulmonology Group</b> |                                                                                       |
| 774 | Tarja Laitinen           | Pirkanmaa Hospital District, Tampere, Finland                                         |
| 775 | Margit Pelkonen          | Northern Savo Hospital District, Kuopio, Finland                                      |
| 776 | Paula Kauppi             | Hospital District of Helsinki and Uusimaa, Helsinki, Finland                          |
| 777 | Hannu Kankaanranta       | Pirkanmaa Hospital District, Tampere, Finland                                         |
| 778 | Terttu Harju             | Northern Ostrobothnia Hospital District, Oulu, Finland                                |
| 779 | Riitta Lahesmaa          | Hospital District of Southwest Finland, Turku, Finland                                |
| 780 | Nizar Smaoui             | Abbvie, Chicago, IL, United States                                                    |
| 781 | Alex Mackay              | Astra Zeneca, Cambridge, United Kingdom                                               |
| 782 | Glenda Lassi             | Astra Zeneca, Cambridge, United Kingdom                                               |

|     |                                       |                                                                                       |
|-----|---------------------------------------|---------------------------------------------------------------------------------------|
| 783 | Susan Eaton                           | Biogen, Cambridge, MA, United States                                                  |
| 784 | Steven Greenberg                      | Celgene, Summit, NJ, United States/ Bristol Myers Squibb, New York, NY, United States |
| 785 | Hubert Chen                           | Genentech, San Francisco, CA, United States                                           |
| 786 | Sarah Pendergrass                     | Genentech, San Francisco, CA, United States                                           |
| 787 | Natalie Bowers                        | Genentech, San Francisco, CA, United States                                           |
| 788 | Joanna Betts                          | GlaxoSmithKline, Brentford, United Kingdom                                            |
| 789 | Soumitra Ghosh                        | GlaxoSmithKline, Brentford, United Kingdom                                            |
| 790 | Kirsi Auro                            | GlaxoSmithKline, Brentford, United Kingdom                                            |
| 791 | Rajashree Mishra                      | GlaxoSmithKline, Brentford, United Kingdom                                            |
| 792 | Sina Rüeger                           | Institute for Molecular Medicine Finland, HiLIFE, University of Helsinki, Finland     |
| 793 |                                       |                                                                                       |
| 794 | <b>Cardiometabolic Diseases Group</b> |                                                                                       |
| 795 | Teemu Niiranen                        | The National Institute of Health and Welfare Helsinki, Finland                        |
| 796 | Felix Vaura                           | The National Institute of Health and Welfare Helsinki, Finland                        |
| 797 | Veikko Salomaa                        | The National Institute of Health and Welfare Helsinki, Finland                        |
| 798 | Markus Juonala                        | Hospital District of Southwest Finland, Turku, Finland                                |
| 799 | Kaj Metsärinne                        | Hospital District of Southwest Finland, Turku, Finland                                |
| 800 | Mika Kähönen                          | Pirkanmaa Hospital District, Tampere, Finland                                         |
| 801 | Juhani Junttila                       | Northern Ostrobothnia Hospital District, Oulu, Finland                                |
| 802 | Markku Laakso                         | Northern Savo Hospital District, Kuopio, Finland                                      |
| 803 | Jussi Pihlajamäki                     | Northern Savo Hospital District, Kuopio, Finland                                      |
| 804 | Daniel Gordin                         | Hospital District of Helsinki and Uusimaa, Helsinki, Finland                          |
| 805 | Juha Sinisalo                         | Hospital District of Helsinki and Uusimaa, Helsinki, Finland                          |
| 806 | Marja-Riitta Taskinen                 | Hospital District of Helsinki and Uusimaa, Helsinki, Finland                          |
| 807 | Tiinamaija Tuomi                      | Hospital District of Helsinki and Uusimaa, Helsinki, Finland                          |
| 808 | Jari Laukkanen                        | Central Finland Health Care District, Jyväskylä, Finland                              |
| 809 | Benjamin Challis                      | Astra Zeneca, Cambridge, United Kingdom                                               |
| 810 | Dirk Paul                             | Astra Zeneca, Cambridge, United Kingdom                                               |
| 811 | Julie Hunkapiller                     | Genentech, San Francisco, CA, United States                                           |
| 812 | Natalie Bowers                        | Genentech, San Francisco, CA, United States                                           |

|     |                                         |                                                                                           |
|-----|-----------------------------------------|-------------------------------------------------------------------------------------------|
| 813 | Sarah Pendergrass                       | Genentech, San Francisco, CA, United States                                               |
| 814 | Onuralp Soylemez                        | Merck, Kenilworth, NJ, United States                                                      |
| 815 | Jaakko Parkkinen                        | Pfizer, New York, NY, United States                                                       |
| 816 | Melissa Miller                          | Pfizer, New York, NY, United States                                                       |
| 817 | Russell Miller                          | Pfizer, New York, NY, United States                                                       |
| 818 | Audrey Chu                              | GlaxoSmithKline, Brentford, United Kingdom                                                |
| 819 | Kirsi Auro                              | GlaxoSmithKline, Brentford, United Kingdom                                                |
| 820 | Keith Usiskin                           | Celgene, Summit, NJ, United States/ Bristol Myers Squibb, New York, NY, United States     |
| 821 | Amanda Elliott                          | Institute for Molecular Medicine Finland, HiLIFE, University of Helsinki, Finland / Broad |
| 822 | Institute, Cambridge, MA, United States |                                                                                           |
| 823 | Joel Rämö                               | Institute for Molecular Medicine Finland, HiLIFE, University of Helsinki, Finland         |
| 824 | Samuli Ripatti                          | Institute for Molecular Medicine Finland, HiLIFE, University of Helsinki, Finland         |
| 825 | Mary Pat Reeve                          | Institute for Molecular Medicine Finland, HiLIFE, University of Helsinki, Finland         |
| 826 | Sanni Ruotsalainen                      | Institute for Molecular Medicine Finland, HiLIFE, University of Helsinki, Finland         |
| 827 |                                         |                                                                                           |
| 828 | <b>Oncology Group</b>                   |                                                                                           |
| 829 | Tuomo Meretoja                          | Hospital District of Helsinki and Uusimaa, Helsinki, Finland                              |
| 830 | Heikki Joensuu                          | Hospital District of Helsinki and Uusimaa, Helsinki, Finland                              |
| 831 | Olli Carpén                             | Hospital District of Helsinki and Uusimaa, Helsinki, Finland                              |
| 832 | Lauri Aaltonen                          | Hospital District of Helsinki and Uusimaa, Helsinki, Finland                              |
| 833 | Johanna Mattson                         | Hospital District of Helsinki and Uusimaa, Helsinki, Finland                              |
| 834 | Annika Auranen                          | Pirkanmaa Hospital District, Tampere, Finland                                             |
| 835 | Peeter Karihtala                        | Northern Ostrobothnia Hospital District, Oulu, Finland                                    |
| 836 | Saila Kauppila                          | Northern Ostrobothnia Hospital District, Oulu, Finland                                    |
| 837 | Päivi Auvinen                           | Northern Savo Hospital District, Kuopio, Finland                                          |
| 838 | Klaus Elenius                           | Hospital District of Southwest Finland, Turku, Finland                                    |
| 839 | Johanna Schleutker                      | Hospital District of Southwest Finland, Turku, Finland                                    |
| 840 | Relja Popovic                           | Abbvie, Chicago, IL, United States                                                        |
| 841 | Jeffrey Waring                          | Abbvie, Chicago, IL, United States                                                        |
| 842 | Bridget Riley-Gillis                    | Abbvie, Chicago, IL, United States                                                        |

|     |                            |                                                                                   |
|-----|----------------------------|-----------------------------------------------------------------------------------|
| 843 | Anne Lehtonen              | Abbvie, Chicago, IL, United States                                                |
| 844 | Jennifer Schutzman         | Genentech, San Francisco, CA, United States                                       |
| 845 | Julie Hunkapiller          | Genentech, San Francisco, CA, United States                                       |
| 846 | Natalie Bowers             | Genentech, San Francisco, CA, United States                                       |
| 847 | Sarah Pendergrass          | Genentech, San Francisco, CA, United States                                       |
| 848 | Andrey Loboda              | Merck, Kenilworth, NJ, United States                                              |
| 849 | Aparna Chhibber            | Merck, Kenilworth, NJ, United States                                              |
| 850 | Heli Lehtonen              | Pfizer, New York, NY, United States                                               |
| 851 | Stefan McDonough           | Pfizer, New York, NY, United States                                               |
| 852 | Marika Crohns              | Sanofi, Paris, France                                                             |
| 853 | Sauli Vuoti                | Sanofi, Paris, France                                                             |
| 854 | Diptee Kulkarni            | GlaxoSmithKline, Brentford, United Kingdom                                        |
| 855 | Kirsi Auro                 | GlaxoSmithKline, Brentford, United Kingdom                                        |
| 856 | Esa Pitkänen               | Institute for Molecular Medicine Finland, HiLIFE, University of Helsinki, Finland |
| 857 | Nina Mars                  | Institute for Molecular Medicine Finland, HiLIFE, University of Helsinki, Finland |
| 858 | Mark Daly                  | Institute for Molecular Medicine Finland, HiLIFE, University of Helsinki, Finland |
| 859 |                            |                                                                                   |
| 860 | <b>Ophthalmology Group</b> |                                                                                   |
| 861 | Kai Kaarniranta            | Northern Savo Hospital District, Kuopio, Finland                                  |
| 862 | Joni A Turunen             | Hospital District of Helsinki and Uusimaa, Helsinki, Finland                      |
| 863 | Terhi Ollila               | Hospital District of Helsinki and Uusimaa, Helsinki, Finland                      |
| 864 | Sanna Seitsonen            | Hospital District of Helsinki and Uusimaa, Helsinki, Finland                      |
| 865 | Hannu Uusitalo             | Pirkanmaa Hospital District, Tampere, Finland                                     |
| 866 | Vesa Aaltonen              | Hospital District of Southwest Finland, Turku, Finland                            |
| 867 | Hannele Uusitalo-Järvinen  | Pirkanmaa Hospital District, Tampere, Finland                                     |
| 868 | Marja Luodonpää            | Northern Ostrobothnia Hospital District, Oulu, Finland                            |
| 869 | Nina Hautala               | Northern Ostrobothnia Hospital District, Oulu, Finland                            |
| 870 | Mengzhen Liu               | Abbvie, Chicago, IL, United States                                                |
| 871 | Heiko Runz                 | Biogen, Cambridge, MA, United States                                              |
| 872 | Stephanie Loomis           | Biogen, Cambridge, MA, United States                                              |

|     |                           |                                                                                           |
|-----|---------------------------|-------------------------------------------------------------------------------------------|
| 873 | Erich Strauss             | Genentech, San Francisco, CA, United States                                               |
| 874 | Natalie Bowers            | Genentech, San Francisco, CA, United States                                               |
| 875 | Hao Chen                  | Genentech, San Francisco, CA, United States                                               |
| 876 | Sarah Pendergrass         | Genentech, San Francisco, CA, United States                                               |
| 877 | Anna Podgornaia           | Merck, Kenilworth, NJ, United States                                                      |
| 878 | Juha Karjalainen          | Institute for Molecular Medicine Finland, HiLIFE, University of Helsinki, Finland / Broad |
| 879 | Institute, Cambridge, MA, | United States                                                                             |
| 880 | Esa Pitkänen              | Institute for Molecular Medicine Finland, HiLIFE, University of Helsinki, Finland         |
| 881 |                           |                                                                                           |
| 882 | <b>Dermatology Group</b>  |                                                                                           |
| 883 | Kaisa Tasanen             | Northern Ostrobothnia Hospital District, Oulu, Finland                                    |
| 884 | Laura Huilaja             | Northern Ostrobothnia Hospital District, Oulu, Finland                                    |
| 885 | Katariina Hannula-Jouppi  | Hospital District of Helsinki and Uusimaa, Helsinki, Finland                              |
| 886 | Teea Salmi                | Pirkanmaa Hospital District, Tampere, Finland                                             |
| 887 | Sirkku Peltonen           | Hospital District of Southwest Finland, Turku, Finland                                    |
| 888 | Leena Koulu               | Hospital District of Southwest Finland, Turku, Finland                                    |
| 889 | Kirsi Kalpala             | Pfizer, New York, NY, United States                                                       |
| 890 | Ying Wu                   | Pfizer, New York, NY, United States                                                       |
| 891 | David Choy                | Genentech, San Francisco, CA, United States                                               |
| 892 | Sarah Pendergrass         | Genentech, San Francisco, CA, United States                                               |
| 893 | Nizar Smaoui              | Abbvie, Chicago, IL, United States                                                        |
| 894 | Fedik Rahimov             | Abbvie, Chicago, IL, United States                                                        |
| 895 | Anne Lehtonen             | Abbvie, Chicago, IL, United States                                                        |
| 896 | Dawn Waterworth           | Janssen Biotech, Beerse, Belgium                                                          |
| 897 |                           |                                                                                           |
| 898 | <b>Odontology Group</b>   |                                                                                           |
| 899 | Pirkko Pussinen           | Hospital District of Helsinki and Uusimaa, Helsinki, Finland                              |
| 900 | Aino Salminen             | Hospital District of Helsinki and Uusimaa, Helsinki, Finland                              |
| 901 | Tuula Salo                | Hospital District of Helsinki and Uusimaa, Helsinki, Finland                              |
| 902 | David Rice                | Hospital District of Helsinki and Uusimaa, Helsinki, Finland                              |

|     |                                              |                                                                                   |
|-----|----------------------------------------------|-----------------------------------------------------------------------------------|
| 903 | Pekka Nieminen                               | Hospital District of Helsinki and Uusimaa, Helsinki, Finland                      |
| 904 | Ulla Palotie                                 | Hospital District of Helsinki and Uusimaa, Helsinki, Finland                      |
| 905 | Juha Sinisalo                                | Hospital District of Helsinki and Uusimaa, Helsinki, Finland                      |
| 906 | Maria Siponen                                | Northern Savo Hospital District, Kuopio, Finland                                  |
| 907 | Liisa Suominen                               | Northern Savo Hospital District, Kuopio, Finland                                  |
| 908 | Päivi Mäntylä                                | Northern Savo Hospital District, Kuopio, Finland                                  |
| 909 | Ulvi Gursoy                                  | Hospital District of Southwest Finland, Turku, Finland                            |
| 910 | Vuokko Anttonen                              | Northern Ostrobothnia Hospital District, Oulu, Finland                            |
| 911 | Kirsi Sipilä                                 | Northern Ostrobothnia Hospital District, Oulu, Finland                            |
| 912 | Sarah Pendergrass                            | Genentech, San Francisco, CA, United States                                       |
| 913 |                                              |                                                                                   |
| 914 | <b>Women's Health and Reproduction Group</b> |                                                                                   |
| 915 | Hannele Laivuori                             | Institute for Molecular Medicine Finland, HiLIFE, University of Helsinki, Finland |
| 916 | Venla Kurra                                  | Pirkanmaa Hospital District, Tampere, Finland                                     |
| 917 | Oskari Heikinheimo                           | Hospital District of Helsinki and Uusimaa, Helsinki, Finland                      |
| 918 | Ilkka Kalliala                               | Hospital District of Helsinki and Uusimaa, Helsinki, Finland                      |
| 919 | Laura Kotaniemi-Talonen                      | Pirkanmaa Hospital District, Tampere, Finland                                     |
| 920 | Kari Nieminen                                | Pirkanmaa Hospital District, Tampere, Finland                                     |
| 921 | Päivi Polo                                   | Hospital District of Southwest Finland, Turku, Finland                            |
| 922 | Kaarin Mäkikallio                            | Hospital District of Southwest Finland, Turku, Finland                            |
| 923 | Eeva Ekholm                                  | Hospital District of Southwest Finland, Turku, Finland                            |
| 924 | Marja Väärasmäki                             | Northern Ostrobothnia Hospital District, Oulu, Finland                            |
| 925 | Outi Uimari                                  | Northern Ostrobothnia Hospital District, Oulu, Finland                            |
| 926 | Laure Morin-Papunen                          | Northern Ostrobothnia Hospital District, Oulu, Finland                            |
| 927 | Marjo Tuppurainen                            | Northern Savo Hospital District, Kuopio, Finland                                  |
| 928 | Katja Kivinen                                | Institute for Molecular Medicine Finland, HiLIFE, University of Helsinki, Finland |
| 929 | Elisabeth Widen                              | Institute for Molecular Medicine Finland, HiLIFE, University of Helsinki, Finland |
| 930 | Taru Tukiainen                               | Institute for Molecular Medicine Finland, HiLIFE, University of Helsinki, Finland |
| 931 | Mary Pat Reeve                               | Institute for Molecular Medicine Finland, HiLIFE, University of Helsinki, Finland |
| 932 | Mark Daly                                    | Institute for Molecular Medicine Finland, HiLIFE, University of Helsinki, Finland |

|     |                                       |                                                                                       |
|-----|---------------------------------------|---------------------------------------------------------------------------------------|
| 933 | Liu Aoxing                            | Institute for Molecular Medicine Finland, HiLIFE, University of Helsinki, Finland     |
| 934 | Eija Laakkonen                        | University of Jyväskylä, Jyväskylä, Finland                                           |
| 935 | Niko Välimäki                         | University of Helsinki, Helsinki, Finland                                             |
| 936 | Lauri Aaltonen                        | Hospital District of Helsinki and Uusimaa, Helsinki, Finland                          |
| 937 | Johannes Kettunen                     | Northern Ostrobothnia Hospital District, Oulu, Finland                                |
| 938 | Mikko Arvas                           | Finnish Red Cross Blood Service, Helsinki, Finland                                    |
| 939 | Jeffrey Waring                        | Abbvie, Chicago, IL, United States                                                    |
| 940 | Bridget Riley-Gillis                  | Abbvie, Chicago, IL, United States                                                    |
| 941 | Mengzhen Liu                          | Abbvie, Chicago, IL, United States                                                    |
| 942 | Janet Kumar                           | GlaxoSmithKline, Brentford, United Kingdom                                            |
| 943 | Kirsi Auro                            | GlaxoSmithKline, Brentford, United Kingdom                                            |
| 944 | Andrea Ganna                          | Institute for Molecular Medicine Finland, HiLIFE, University of Helsinki, Finland     |
| 945 | Sarah Pendergrass                     | Genentech, San Francisco, CA, United States                                           |
| 946 |                                       |                                                                                       |
| 947 | <b>FinnGen Analysis working group</b> |                                                                                       |
| 948 | Justin Wade Davis                     | Abbvie, Chicago, IL, United States                                                    |
| 949 | Bridget Riley-Gillis                  | Abbvie, Chicago, IL, United States                                                    |
| 950 | Danjuma Quarless                      | Abbvie, Chicago, IL, United States                                                    |
| 951 | Fedik Rahimov                         | Abbvie, Chicago, IL, United States                                                    |
| 952 | Sahar Esmaeeli                        | Abbvie, Chicago, IL, United States                                                    |
| 953 | Slavé Petrovski                       | Astra Zeneca, Cambridge, United Kingdom                                               |
| 954 | Eleonor Wigmore                       | Astra Zeneca, Cambridge, United Kingdom                                               |
| 955 | Adele Mitchell                        | Biogen, Cambridge, MA, United States                                                  |
| 956 | Benjamin Sun                          | Biogen, Cambridge, MA, United States                                                  |
| 957 | Ellen Tsai                            | Biogen, Cambridge, MA, United States                                                  |
| 958 | Denis Baird                           | Biogen, Cambridge, MA, United States                                                  |
| 959 | Paola Bronson                         | Biogen, Cambridge, MA, United States                                                  |
| 960 | Ruoyu Tian                            | Biogen, Cambridge, MA, United States                                                  |
| 961 | Stephanie Loomis                      | Biogen, Cambridge, MA, United States                                                  |
| 962 | Yunfeng Huang                         | Biogen, Cambridge, MA, United States                                                  |
| 963 | Joseph Maranville                     | Celgene, Summit, NJ, United States/ Bristol Myers Squibb, New York, NY, United States |

|     |                   |                                                                                       |
|-----|-------------------|---------------------------------------------------------------------------------------|
| 964 | Shameek Biswas    | Celgene, Summit, NJ, United States/ Bristol Myers Squibb, New York, NY, United States |
| 965 | Elmutaz Mohammed  | Celgene, Summit, NJ, United States/ Bristol Myers Squibb, New York, NY, United States |
| 966 | Samir Wadhawan    | Celgene, Summit, NJ, United States/ Bristol Myers Squibb, New York, NY, United States |
| 967 | Erika Kvikstad    | Celgene, Summit, NJ, United States/ Bristol Myers Squibb, New York, NY, United States |
| 968 | Minal Caliskan    | Celgene, Summit, NJ, United States/ Bristol Myers Squibb, New York, NY, United States |
| 969 | Diana Chang       | Genentech, San Francisco, CA, United States                                           |
| 970 | Julie Hunkapiller | Genentech, San Francisco, CA, United States                                           |
| 971 | Tushar Bhangale   | Genentech, San Francisco, CA, United States                                           |
| 972 | Natalie Bowers    | Genentech, San Francisco, CA, United States                                           |
| 973 | Sarah Pendergrass | Genentech, San Francisco, CA, United States                                           |
| 974 | Kirill Shkura     | Merck, Kenilworth, NJ, United States                                                  |
| 975 | Victor Neduva     | Merck, Kenilworth, NJ, United States                                                  |
| 976 | Xing Chen         | Pfizer, New York, NY, United States                                                   |
| 977 | Åsa Hedman        | Pfizer, New York, NY, United States                                                   |
| 978 | Karen S King      | GlaxoSmithKline, Brentford, United Kingdom                                            |
| 979 | Padhraig Gormley  | GlaxoSmithKline, Brentford, United Kingdom                                            |
| 980 | Jimmy Liu         | GlaxoSmithKline, Brentford, United Kingdom                                            |
| 981 | Clarence Wang     | Sanofi, Paris, France                                                                 |
| 982 | Ethan Xu          | Sanofi, Paris, France                                                                 |
| 983 | Franck Auge       | Sanofi, Paris, France                                                                 |
| 984 | Clement Chatelain | Sanofi, Paris, France                                                                 |
| 985 | Deepak Rajpal     | Sanofi, Paris, France                                                                 |
| 986 | Dongyu Liu        | Sanofi, Paris, France                                                                 |
| 987 | Katherine Call    | Sanofi, Paris, France                                                                 |
| 988 | Tai-He Xia        | Sanofi, Paris, France                                                                 |
| 989 | Beryl Cummings    | Maze Therapeutics, San Francisco, CA, United States                                   |
| 990 | Matt Brauer       | Maze Therapeutics, San Francisco, CA, United States                                   |
| 991 | Huilei Xu         | Novartis, Basel, Switzerland                                                          |
| 992 | Amy Cole          | Novartis, Basel, Switzerland                                                          |
| 993 | Jonathan Chung    | Novartis, Basel, Switzerland                                                          |



|      |                                         |                                                                                           |
|------|-----------------------------------------|-------------------------------------------------------------------------------------------|
| 994  | Jaison Jacob                            | Novartis, Basel, Switzerland                                                              |
| 995  | Katrina de Lange                        | Novartis, Basel, Switzerland                                                              |
| 996  | Jonas Zierer                            | Novartis, Basel, Switzerland                                                              |
| 997  | Mitja Kurki                             | Institute for Molecular Medicine Finland, HiLIFE, University of Helsinki, Finland / Broad |
| 998  | Institute, Cambridge, MA, United States |                                                                                           |
| 999  | Samuli Ripatti                          | Institute for Molecular Medicine Finland, HiLIFE, University of Helsinki, Finland         |
| 1000 | Mark Daly                               | Institute for Molecular Medicine Finland, HiLIFE, University of Helsinki, Finland         |
| 1001 | Juha Karjalainen                        | Institute for Molecular Medicine Finland, HiLIFE, University of Helsinki, Finland / Broad |
| 1002 | Institute, Cambridge, MA, United States |                                                                                           |
| 1003 | Aki Havulinna                           | Institute for Molecular Medicine Finland, HiLIFE, University of Helsinki, Finland         |
| 1004 | Juha Mehtonen                           | Institute for Molecular Medicine Finland, HiLIFE, University of Helsinki, Finland         |
| 1005 | Priit Palta                             | Institute for Molecular Medicine Finland, HiLIFE, University of Helsinki, Finland         |
| 1006 | Shabbeer Hassan                         | Institute for Molecular Medicine Finland, HiLIFE, University of Helsinki, Finland         |
| 1007 | Pietro Della Briotta Parolo             | Institute for Molecular Medicine Finland, HiLIFE, University of Helsinki, Finland         |
| 1008 | Wei Zhou                                | Broad Institute, Cambridge, MA, United States                                             |
| 1009 | Mutaamba Maasha                         | Broad Institute, Cambridge, MA, United States                                             |
| 1010 | Shabbeer Hassan                         | Institute for Molecular Medicine Finland, HiLIFE, University of Helsinki, Finland         |
| 1011 | Susanna Lemmelä                         | Institute for Molecular Medicine Finland, HiLIFE, University of Helsinki, Finland         |
| 1012 | Manuel Rivas                            | University of Stanford, Stanford, CA, United States                                       |
| 1013 | Aarno Palotie                           | Institute for Molecular Medicine Finland, HiLIFE, University of Helsinki, Finland         |
| 1014 | Arto Lehisto                            | Institute for Molecular Medicine Finland, HiLIFE, University of Helsinki, Finland         |
| 1015 | Andrea Ganna                            | Institute for Molecular Medicine Finland, HiLIFE, University of Helsinki, Finland         |
| 1016 | Vincent Llorens                         | Institute for Molecular Medicine Finland, HiLIFE, University of Helsinki, Finland         |
| 1017 | Hannele Laivuori                        | Institute for Molecular Medicine Finland, HiLIFE, University of Helsinki, Finland         |
| 1018 | Mari E Niemi                            | Institute for Molecular Medicine Finland, HiLIFE, University of Helsinki, Finland         |
| 1019 | Taru Tukiainen                          | Institute for Molecular Medicine Finland, HiLIFE, University of Helsinki, Finland         |
| 1020 | Mary Pat Reeve                          | Institute for Molecular Medicine Finland, HiLIFE, University of Helsinki, Finland         |
| 1021 | Henrike Heyne                           | Institute for Molecular Medicine Finland, HiLIFE, University of Helsinki, Finland         |
| 1022 | Nina Mars                               | Institute for Molecular Medicine Finland, HiLIFE, University of Helsinki, Finland         |
| 1023 | Kimmo Palin                             | University of Helsinki, Helsinki, Finland                                                 |

|      |                                         |                                                                                               |
|------|-----------------------------------------|-----------------------------------------------------------------------------------------------|
| 1024 | Javier Garcia-Tabuenca                  | University of Tampere, Tampere, Finland                                                       |
| 1025 | Harri Siirtola                          | University of Tampere, Tampere, Finland                                                       |
| 1026 | Tuomo Kiiskinen                         | Institute for Molecular Medicine Finland, HiLIFE, University of Helsinki, Finland             |
| 1027 | Jiwoo Lee                               | Institute for Molecular Medicine Finland, HiLIFE, University of Helsinki, Finland / Broad     |
| 1028 | Institute, Cambridge, MA, United States |                                                                                               |
| 1029 | Kristin Tsuo                            | Institute for Molecular Medicine Finland, HiLIFE, University of Helsinki, Finland / Broad     |
| 1030 | Institute, Cambridge, MA, United States |                                                                                               |
| 1031 | Amanda Elliott                          | Institute for Molecular Medicine Finland, HiLIFE, University of Helsinki, Finland / Broad     |
| 1032 | Institute, Cambridge, MA, United States |                                                                                               |
| 1033 | Kati Kristiansson                       | THL Biobank / The National Institute of Health and Welfare Helsinki, Finland                  |
| 1034 | Mikko Arvas                             | Finnish Red Cross Blood Service / Finnish Hematology Registry and Clinical Biobank,           |
| 1035 | Helsinki, Finland                       |                                                                                               |
| 1036 | Kati Hyvärinen                          | Finnish Red Cross Blood Service, Helsinki, Finland                                            |
| 1037 | Jarmo Ritari                            | Finnish Red Cross Blood Service, Helsinki, Finland                                            |
| 1038 | Miika Koskinen                          | Helsinki Biobank / Helsinki University and Hospital District of Helsinki and Uusimaa,         |
| 1039 | Helsinki                                |                                                                                               |
| 1040 | Olli Carpén                             | Helsinki Biobank / Helsinki University and Hospital District of Helsinki and Uusimaa,         |
| 1041 | Helsinki                                |                                                                                               |
| 1042 | Johannes Kettunen                       | Northern Finland Biobank Borealis / University of Oulu / Northern Ostrobothnia Hospital       |
| 1043 | District, Oulu, Finland                 |                                                                                               |
| 1044 | Katri Pylkäs                            | University of Oulu, Oulu, Finland                                                             |
| 1045 | Marita Kalaoja                          | University of Oulu, Oulu, Finland                                                             |
| 1046 | Minna Karjalainen                       | University of Oulu, Oulu, Finland                                                             |
| 1047 | Tuomo Mantere                           | Northern Finland Biobank Borealis / University of Oulu / Northern Ostrobothnia Hospital       |
| 1048 | District, Oulu, Finland                 |                                                                                               |
| 1049 | Eeva Kangasniemi                        | Finnish Clinical Biobank Tampere / University of Tampere / Pirkanmaa Hospital District,       |
| 1050 | Tampere, Finland                        |                                                                                               |
| 1051 | Sami Heikkinen                          | University of Eastern Finland, Kuopio, Finland                                                |
| 1052 | Arto Mannermaa                          | Biobank of Eastern Finland / University of Eastern Finland / Northern Savo Hospital District, |
| 1053 | Kuopio, Finland                         |                                                                                               |

|      |                                  |                                                                                               |
|------|----------------------------------|-----------------------------------------------------------------------------------------------|
| 1054 | Eija Laakkonen                   | University of Jyväskylä, Jyväskylä, Finland                                                   |
| 1055 | Samuel Heron                     | University of Turku, Turku, Finland                                                           |
| 1056 | Dhanaprakash Jambulingam         | University of Turku, Turku, Finland                                                           |
| 1057 | Venkat Subramaniam Rathinakannan | University of Turku, Turku, Finland                                                           |
| 1058 | Nina Pitkänen                    | Auria Biobank / University of Turku / Hospital District of Southwest Finland, Turku,          |
| 1059 | Finland                          |                                                                                               |
| 1060 |                                  |                                                                                               |
| 1061 | <b>Biobank directors</b>         |                                                                                               |
| 1062 | Lila Kallio                      | Auria Biobank / University of Turku / Hospital District of Southwest Finland, Turku,          |
| 1063 | Finland                          |                                                                                               |
| 1064 | Sirpa Soini                      | THL Biobank / The National Institute of Health and Welfare Helsinki, Finland                  |
| 1065 | Jukka Partanen                   | Finnish Red Cross Blood Service / Finnish Hematology Registry and Clinical Biobank,           |
| 1066 | Helsinki, Finland                |                                                                                               |
| 1067 | Eero Punkka                      | Helsinki Biobank / Helsinki University and Hospital District of Helsinki and Uusimaa,         |
| 1068 | Helsinki                         |                                                                                               |
| 1069 | Raisa Serpi                      | Northern Finland Biobank Borealis / University of Oulu / Northern Ostrobothnia Hospital       |
| 1070 | District, Oulu, Finland          |                                                                                               |
| 1071 | Johanna Mäkelä                   | Finnish Clinical Biobank Tampere / University of Tampere / Pirkanmaa Hospital District,       |
| 1072 | Tampere, Finland                 |                                                                                               |
| 1073 | Veli-Matti Kosma                 | Biobank of Eastern Finland / University of Eastern Finland / Northern Savo Hospital District, |
| 1074 | Kuopio, Finland                  |                                                                                               |
| 1075 | Teijo Kuopio                     | Central Finland Biobank / University of Jyväskylä / Central Finland Health Care District,     |
| 1076 | Jyväskylä, Finland               |                                                                                               |
| 1077 |                                  |                                                                                               |
| 1078 | <b>FinnGen Teams</b>             |                                                                                               |
| 1079 | <b>Administration</b>            |                                                                                               |
| 1080 | Anu Jalanko                      | Institute for Molecular Medicine Finland, HiLIFE, University of Helsinki, Finland             |
| 1081 | Huei-Yi Shen                     | Institute for Molecular Medicine Finland, HiLIFE, University of Helsinki, Finland             |
| 1082 | Risto Kajanne                    | Institute for Molecular Medicine Finland, HiLIFE, University of Helsinki, Finland             |
| 1083 | Mervi Aavikko                    | Institute for Molecular Medicine Finland, HiLIFE, University of Helsinki, Finland             |

1084

1085

1086 **Analysis**

1087 Mitja Kurki Institute for Molecular Medicine Finland, HiLIFE, University of Helsinki, Finland / Broad

1088 Institute, Cambridge, MA, United States

1089 Juha Karjalainen Institute for Molecular Medicine Finland, HiLIFE, University of Helsinki, Finland / Broad

1090 Institute, Cambridge, MA, United States

1091 Pietro Della Briotta Parolo Institute for Molecular Medicine Finland, HiLIFE, University of Helsinki, Finland

1092 Arto Lehisto Institute for Molecular Medicine Finland, HiLIFE, University of Helsinki, Finland

1093 Juha Mehtonen Institute for Molecular Medicine Finland, HiLIFE, University of Helsinki, Finland

1094 Wei Zhou Broad Institute, Cambridge, MA, United States

1095 Masahiro Kanai Broad Institute, Cambridge, MA, United States

1096 Mutaamba Maasha Broad Institute, Cambridge, MA, United States

1097

1098 **Clinical Endpoint Development**

1099 Hannele Laivuori Institute for Molecular Medicine Finland, HiLIFE, University of Helsinki, Finland

1100 Aki Havulinna Institute for Molecular Medicine Finland, HiLIFE, University of Helsinki, Finland

1101 Susanna Lemmelä Institute for Molecular Medicine Finland, HiLIFE, University of Helsinki, Finland

1102 Tuomo Kiiskinen Institute for Molecular Medicine Finland, HiLIFE, University of Helsinki, Finland

1103 L. Elisa Lahtela Institute for Molecular Medicine Finland, HiLIFE, University of Helsinki, Finland

1104

1105 **Communication**

1106 Mari Kaunisto Institute for Molecular Medicine Finland, HiLIFE, University of Helsinki, Finland

1107

1108 **E-Science**

1109 Elina Kilpeläinen Institute for Molecular Medicine Finland, HiLIFE, University of Helsinki, Finland

1110 Timo P. Sipilä Institute for Molecular Medicine Finland, HiLIFE, University of Helsinki, Finland

1111 Georg Brein Institute for Molecular Medicine Finland, HiLIFE, University of Helsinki, Finland

1112 Oluwaseun Alexander Dada Institute for Molecular Medicine Finland, HiLIFE, University of Helsinki, Finland

|      |                                       |                                                                                       |
|------|---------------------------------------|---------------------------------------------------------------------------------------|
| 1113 | Awaisa Ghazal                         | Institute for Molecular Medicine Finland, HiLIFE, University of Helsinki, Finland     |
| 1114 | Anastasia Shcherban                   | Institute for Molecular Medicine Finland, HiLIFE, University of Helsinki, Finland     |
| 1115 |                                       |                                                                                       |
| 1116 | <b>Genotyping</b>                     |                                                                                       |
| 1117 | Kati Donner                           | Institute for Molecular Medicine Finland, HiLIFE, University of Helsinki, Finland     |
| 1118 | Timo P. Sipilä                        | Institute for Molecular Medicine Finland, HiLIFE, University of Helsinki, Finland     |
| 1119 |                                       |                                                                                       |
| 1120 | <b>Sample Collection Coordination</b> |                                                                                       |
| 1121 | Anu Loukola                           | Helsinki Biobank / Helsinki University and Hospital District of Helsinki and Uusimaa, |
| 1122 | Helsinki                              |                                                                                       |
| 1123 |                                       |                                                                                       |
| 1124 | <b>Sample Logistics</b>               |                                                                                       |
| 1125 | Päivi Laiho                           | THL Biobank / The National Institute of Health and Welfare Helsinki, Finland          |
| 1126 | Tuuli Sistonen                        | THL Biobank / The National Institute of Health and Welfare Helsinki, Finland          |
| 1127 | Essi Kaiharju                         | THL Biobank / The National Institute of Health and Welfare Helsinki, Finland          |
| 1128 | Markku Laukkanen                      | THL Biobank / The National Institute of Health and Welfare Helsinki, Finland          |
| 1129 | Elina Järvensivu                      | THL Biobank / The National Institute of Health and Welfare Helsinki, Finland          |
| 1130 | Sini Lähteenmäki                      | THL Biobank / The National Institute of Health and Welfare Helsinki, Finland          |
| 1131 | Lotta Männikkö                        | THL Biobank / The National Institute of Health and Welfare Helsinki, Finland          |
| 1132 | Regis Wong                            | THL Biobank / The National Institute of Health and Welfare Helsinki, Finland          |
| 1133 |                                       |                                                                                       |
| 1134 | <b>Registry Data Operations</b>       |                                                                                       |
| 1135 | Hannele Mattsson                      | THL Biobank / The National Institute of Health and Welfare Helsinki, Finland          |
| 1136 | Kati Kristiansson                     | THL Biobank / The National Institute of Health and Welfare Helsinki, Finland          |
| 1137 | Susanna Lemmelä                       | Institute for Molecular Medicine Finland, HiLIFE, University of Helsinki, Finland     |
| 1138 | Sami Koskelainen                      | THL Biobank / The National Institute of Health and Welfare Helsinki, Finland          |
| 1139 | Tero Hiekkalinna                      | THL Biobank / The National Institute of Health and Welfare Helsinki, Finland          |
| 1140 | Teemu Paaanen                         | THL Biobank / The National Institute of Health and Welfare Helsinki, Finland          |
| 1141 |                                       |                                                                                       |
| 1142 |                                       |                                                                                       |

## 1143 Sequencing Informatics

1144 Priit Palta Institute for Molecular Medicine Finland, HiLIFE, University of Helsinki, Finland

1145 Kalle Pärn Institute for Molecular Medicine Finland, HiLIFE, University of Helsinki, Finland

1146 Shuang Luo Institute for Molecular Medicine Finland, HiLIFE, University of Helsinki, Finland

1147 Vishal Sinha Institute for Molecular Medicine Finland, HiLIFE, University of Helsinki, Finland

1148

## 1149 Trajectory

1150 Tarja Laitinen Pirkanmaa Hospital District, Tampere, Finland

1151 Mary Pat Reeve Institute for Molecular Medicine Finland, HiLIFE, University of Helsinki, Finland

1152 Harri Siirtola University of Tampere, Tampere, Finland

1153 Javier Gracia-Tabuenca University of Tampere, Tampere, Finland

1154 Mika Helminen University of Tampere, Tampere, Finland

1155 Tiina Luukkaala University of Tampere, Tampere, Finland

1156 Iida Vähätalo University of Tampere, Tampere, Finland

1157

## 1158 Data protection officer

1159 Tero Jyrhämä Institute for Molecular Medicine Finland, HiLIFE, University of Helsinki, Finland

1160

## 1161 FinBB - Finnish biobank cooperative

1162 Marco Hautalahti

1163 Laura Mustaniemi

1164 Mirkka Koivusalo

1165 Sarah Smith

1166 Tom Southerington

1167

## 1168 Declaration of Interests

1169 The authors declare no competing interests.

1170

# 1171 Ethics statement

1172 Patients and control subjects in FinnGen provided informed consent for biobank research, based on  
 1173 the Finnish Biobank Act. Alternatively, separate research cohorts, collected prior the Finnish Biobank  
 1174 Act came into effect (in September 2013) and start of FinnGen (August 2017), were collected based  
 1175 on study-specific consents and later transferred to the Finnish biobanks after approval by Fimea, the  
 1176 National Supervisory Authority for Welfare and Health. Recruitment protocols followed the biobank  
 1177 protocols approved by Fimea. The Coordinating Ethics Committee of the Hospital District of Helsinki  
 1178 and Uusimaa (HUS) approved the FinnGen study protocol Nr HUS/990/2017.

1179  
 1180 The FinnGen study is approved by Finnish Institute for Health and Welfare (permit numbers:  
 1181 THL/2031/6.02.00/2017, THL/1101/5.05.00/2017, THL/341/6.02.00/2018,  
 1182 THL/2222/6.02.00/2018, THL/283/6.02.00/2019, THL/1721/5.05.00/2019,  
 1183 THL/1524/5.05.00/2020, and THL/2364/14.02/2020), Digital and population data service agency  
 1184 (permit numbers: VRK43431/2017-3, VRK/6909/2018-3, VRK/4415/2019-3), the Social Insurance  
 1185 Institution (permit numbers: KELA 58/522/2017, KELA 131/522/2018, KELA 70/522/2019, KELA  
 1186 98/522/2019, KELA 138/522/2019, KELA 2/522/2020, KELA 16/522/2020 and Statistics Finland  
 1187 (permit numbers: TK-53-1041-17 and TK-53-90-20).

1188  
 1189 The Biobank Access Decisions for FinnGen samples and data utilized in FinnGen Data Freeze 6  
 1190 include: THL Biobank BB2017\_55, BB2017\_111, BB2018\_19, BB\_2018\_34, BB\_2018\_67,  
 1191 BB2018\_71, BB2019\_7, BB2019\_8, BB2019\_26, BB2020\_1, Finnish Red Cross Blood Service  
 1192 Biobank 7.12.2017, Helsinki Biobank HUS/359/2017, Auria Biobank AB17-5154, Biobank Borealis  
 1193 of Northern Finland\_2017\_1013, Biobank of Eastern Finland 1186/2018, Finnish Clinical Biobank  
 1194 Tampere MH0004, Central Finland Biobank 1-2017, and Terveystalo Biobank STB 2018001.

1195

1196 The FINRISK data used for the study were obtained from THL Biobank with application number  
1197 BB2015\_55.1 and UKBB data using the UK Biobank Resource with application number 22627.  
1198 The study was approved by the Estonian Committee on Bioethics and Human Research (approval  
1199 number 1.1-12/624).

## 1200 Figures and tables

1201 **Figure 1:** GWAS results for coronary atherosclerosis in FinnGen. Total number of independent  
1202 genome-wide significant associations (GWS;  $p < 5 \times 10^{-8}$ ) is 38, the lead variant in each marked with  
1203 diamonds. Four novel associations for CVD- related phenotypes are highlighted with  $\pm 750$  Mb  
1204 around the lead variant in the region as red and the lead variant marked with red diamond.....10

1205 **Figure 2:** Phenome-wide association study (PheWAS) results for rs534125149. Total number of  
1206 tested endpoints is 2 861 (A complete list of endpoints analyzed and their definitions is available at  
1207 <https://www.finnngen.fi/en/researchers/clinical-endpoints>). The dashed line represents the phenome-  
1208 wide significance threshold, multiple testing corrected by the number of endpoints =  $0.05 / 2\,861 =$   
1209  $1.75 \times 10^{-5}$ . All endpoints reaching that threshold are labelled in the figure.....13

1210 **Figure 3:** Comparison of the effects (OR) of rs534125149 and rs201988637 for 14 endpoints with  
1211 p-value  $< 1.75 \times 10^{-5}$  (PWS) for rs534125149. 95% confidence intervals represented as grey lines.14

1212 **Figure 4:** Cumulative incidence plots for myocardial infarction. Red line represents carriers (homo-  
1213 or heterozygous) for either rs534125149 or rs201988637, and blue line represent non-carriers.  
1214 Dashed lines represent 95%- confidence intervals. ....16

1215 **Figure 5:** Results for pulse pressure association across all cohorts with splice acceptor variant  
1216 rs201988637 present. ....18

1217  
1218 **Table 1:** Basic characteristics of the study cohort.....5

1219 **Table 2:** Lead variants in novel loci associated with coronary atherosclerosis. ....11

1220 **Table 3:** Results of the conditional analysis on MI and coronary atherosclerosis. ....15
